# Supplementary material
Source: publisher site journal article supplement (https://www.dovepress.com/article/593127)
Supplement: Supplementary file 1 [file 593127%20Supplementary%20Material.pdf]

**Supplemental file 1. List of the 274 papers included in this review**

| PMID    | Title                                                                                                                           | Authors                                                                                       | Journal (with Year, Volume, Issue, Pages)                                                                       | Publication date | Doi                                                               |
|---------|---------------------------------------------------------------------------------------------------------------------------------|-----------------------------------------------------------------------------------------------|-----------------------------------------------------------------------------------------------------------------|------------------|-------------------------------------------------------------------|
| 5057072 | Body image and depression                                                                                                       | Peto A.                                                                                       | Int J Psychoanal. 1972;53(2):259-63.                                                                            | 1972/1/1         |                                                                   |
| 1162020 | Personality characteristics, body image and social attitudes of organ transplant donors versus nondonors                        | Cleveland SE.                                                                                 | Psychosom Med. 1975 Jul-Aug;37(4):313-9. doi: 10.1097/00006842-197507000-00004.                                 | 1975/7/1         | 10.1097/00006842-197507000-00004                                  |
| 441230  | Adjustment in diabetic adolescent girls: II. Adjustment, self-esteem, and depression in diabetic adolescent girls               | Sullivan BJ.                                                                                  | Psychosom Med. 1979 Mar;41(2):127-38. doi: 10.1097/00006842-197903000-00006.                                    | 1979/3/1         | 10.1097/00006842-197903000-00006                                  |
| 7280161 | The relation of personality characteristics to body image disturbances in juvenile anorexia nervosa: a multivariate analysis    | Strober M.                                                                                    | Psychosom Med. 1981 Aug;43(4):323-30. doi: 10.1097/00006842-198108000-00005.                                    | 1981/8/1         | 10.1097/00006842-198108000-00005                                  |
| 6480837 | Depression in multiple sclerosis as a function of length and severity of illness, age, remissions, and perceived social support | McIvor GP, Riklan M, Reznikoff M.                                                             | J Clin Psychol. 1984 Jul;40(4):1028-33. doi: 10.1002/1097-4679(198407)40:4<1028::aid-jclp2270400427>3.0.co;2-1. | 1984/7/1         | 10.1002/1097-4679(198407)40:4<1028::aid-jclp2270400427>3.0.co;2-1 |
| 3980834 | Body image, physical attractiveness, and depression                                                                             | Noles SW, Cash TF, Winstead BA.                                                               | J Consult Clin Psychol. 1985 Feb;53(1):88-94. doi: 10.1037//0022-006x.53.1.88.                                  | 1985/2/1         | 10.1037//0022-006x.53.1.88                                        |
| 3808872 | Body-image distortion and dissatisfaction in university students                                                                | Mable HM, Balance WD, Galgan RJ.                                                              | Percept Mot Skills. 1986 Oct;63(2 Pt 2):907-11. doi: 10.2466/pms.1986.63.2.907.                                 | 1986/10/1        | 10.2466/pms.1986.63.2.907                                         |
| 3597656 | Depression and body image following mastectomy and lumpectomy                                                                   | Lasry JC, Margolese RG, Poisson R, Shibata H, Fleischer D, Lafleur D, Legault S, Taillefer S. | J Chronic Dis. 1987;40(6):529-34. doi:                                                                          | 1987/1/1         | 10.1016/0021-9681(87)90010-                                       |

|         |                                                                                                                           |                                               |                                                                                                               |           |                                                                  |
|---------|---------------------------------------------------------------------------------------------------------------------------|-----------------------------------------------|---------------------------------------------------------------------------------------------------------------|-----------|------------------------------------------------------------------|
|         |                                                                                                                           |                                               | 10.1016/0021-9681(87)90010-5.                                                                                 |           | 5                                                                |
| 2461390 | The right cerebral hemisphere: emotion, music, visual-spatial skills, body-image, dreams, and awareness                   | Joseph R.                                     | J Clin Psychol. 1988 Sep;44(5):630-73. doi: 10.1002/1097-4679(198809)44:5<630::aid-jclp2270440502>3.0.co;2-v. | 1988/9/1  | 10.1002/1097-4679(198809)44:5<630::aid-jclp2270440502>3.0.co;2-v |
| 2795495 | Body image and depression in women with early and late onset obesity                                                      | Faubel M.                                     | J Psychol. 1989 Jul;123(4):385-95. doi: 10.1080/00223980.1989.10542993.                                       | 1989/7/1  | 10.1080/00223980.1989.10542993                                   |
| 2793926 | Body image, self-esteem, and depression in burn-injured adolescents and young adults                                      | Orr DA, Reznikoff M, Smith GM.                | J Burn Care Rehabil. 1989 Sep-Oct;10(5):454-61. doi: 10.1097/00004630-198909000-00016.                        | 1989/9/1  | 10.1097/00004630-198909000-00016                                 |
| 2307767 | Sex differences and adolescent depression                                                                                 | Allgood-Merten B, Lewinsohn PM, Hops H.       | J Abnorm Psychol. 1990 Feb;99(1):55-63. doi: 10.1037//0021-843x.99.1.55.                                      | 1990/2/1  | 10.1037//0021-843x.99.1.55                                       |
| 1422651 | Bulimia nervosa symptomatology and body image disturbance associated with distance running and weight loss                | Gleaves DH, Williamson DA, Fuller RD.         | Br J Sports Med. 1992 Sep;26(3):157-60. doi: 10.1136/bjism.26.3.157.                                          | 1992/9/1  | 10.1136/bjism.26.3.157                                           |
| 8302975 | Psychometric properties of scales for the measurement of psychosocial variables associated with depression in adolescence | Andrews JA, Lewinsohn PM, Hops H, Roberts RE. | Psychol Rep. 1993 Dec;73(3 Pt 1):1019-46. doi: 10.2466/pr0.1993.73.3.1019.                                    | 1993/12/1 | 10.2466/pr0.1993.73.3.1019                                       |
| 8111492 | Body image and health counseling for women                                                                                | Bresolin L.                                   | Arch Fam Med. 1993 Oct;2(10):1084-7. doi: 10.1001/archfami.2.10.1084.                                         | 1993/10/1 | 10.1001/archfami.2.10.1084                                       |
| 8332667 | Factors related to depression and                                                                                         | Grubb HJ, Sellers MI, Waligroski K.           | Psychol Rep. 1993                                                                                             | 1993/6/1  | 10.2466/pr0.199                                                  |

|         |                                                                                                                           |                                                      |                                                                                                                 |           |                                                                 |
|---------|---------------------------------------------------------------------------------------------------------------------------|------------------------------------------------------|-----------------------------------------------------------------------------------------------------------------|-----------|-----------------------------------------------------------------|
|         | eating disorders: self-esteem, body image, and attractiveness                                                             |                                                      | Jun;72(3 Pt 1):1003-10. doi: 10.2466/pr0.1993.72.3.1003.                                                        |           | 3.72.3.1003                                                     |
| 8245136 | Depressive symptomatology, perceptions of attractiveness, and body image in children                                      | McCabe M, Marwit SJ.                                 | J Child Psychol Psychiatry. 1993 Oct;34(7):1117-24. doi: 10.1111/j.1469-7610.1993.tb01777.x.                    | 1993/10/1 | 10.1111/j.1469-7610.1993.tb01777.x                              |
| 8339100 | Preliminary test of two hypotheses of body image disturbance                                                              | Thompson JK, Heinberg LJ.                            | Int J Eat Disord. 1993 Jul;14(1):59-63. doi: 10.1002/1098-108x(199307)14:1<59::aid-eat2260140108>3.0.co;2-t.    | 1993/7/1  | 10.1002/1098-108x(199307)14:1<59::aid-eat2260140108>3.0.co;2-t  |
| 7987354 | Waist-to-hip ratio and body dissatisfaction among college women and men: moderating role of depressed symptoms and gender | Joiner TE Jr, Schmidt NB, Singh D.                   | Int J Eat Disord. 1994 Sep;16(2):199-203. doi: 10.1002/1098-108x(199409)16:2<199::aid-eat2260160211>3.0.co;2-m. | 1994/9/1  | 10.1002/1098-108x(199409)16:2<199::aid-eat2260160211>3.0.co;2-m |
| 8086824 | Depression and body image disorders in adolescence                                                                        | Petersen AC, Leffert N, Graham B, Ding S, Overbey T. | Womens Health Issues. 1994 Summer;4(2):98-108. doi: 10.1016/s1049-3867(05)80043-x.                              | 1994/1/1  | 10.1016/s1049-3867(05)80043-x                                   |
| 8086812 | Psychological and social issues during adolescence. Depression and body image problems in adolescence                     | Petersen AC.                                         | Womens Health Issues. 1994 Summer;4(2):63-5; discussion 68-70. doi: 10.1016/s1049-3867(05)80031-3.              | 1994/1/1  | 10.1016/s1049-3867(05)80031-3                                   |
| 7659601 | Body image disturbance in body dysmorphic disorder and eating disorders. Obsessions or delusions?                         | Phillips KA, Kim JM, Hudson JI.                      | Psychiatr Clin North Am. 1995 Jun;18(2):317-34.                                                                 | 1995/6/1  |                                                                 |

|          |                                                                                                                          |                                                                         |                                                                            |            |                                    |
|----------|--------------------------------------------------------------------------------------------------------------------------|-------------------------------------------------------------------------|----------------------------------------------------------------------------|------------|------------------------------------|
| 8885207  | Differences in body image and depression among obese women with and without binge eating disorder                        | Mussell MP, Peterson CB, Weller CL, Crosby RD, de Zwaan M, Mitchell JE. | Obes Res. 1996 Sep;4(5):431-9. doi: 10.1002/j.1550-8528.1996.tb00251.x.    | 1996/9/1   | 10.1002/j.1550-8528.1996.tb00251.x |
| 8722731  | Gender differences in the expression of depressive symptoms among chronic pain patients                                  | Novy DM, Nelson DV, Averill PM, Berry LA.                               | Clin J Pain. 1996 Mar;12(1):23-9. doi: 10.1097/00002508-199603000-00005.   | 1996/3/1   | 10.1097/00002508-199603000-00005   |
| 8653150  | The problem with weighing: effects on mood, self-esteem and body image                                                   | Ogden J, Evans C.                                                       | Int J Obes Relat Metab Disord. 1996 Mar;20(3):272-7.                       | 1996/3/1   |                                    |
| 8842858  | The effects of peer ridicule on depression and self-image among adolescent females with Turner syndrome                  | Rickert VI, Hassed SJ, Hendon AE, Cunniff C.                            | J Adolesc Health. 1996 Jul;19(1):34-8. doi: 10.1016/1054-139X(95)00225-H.  | 1996/7/1   | 10.1016/1054-139X(95)00225-H       |
| 9360735  | Weight, weight-related aspects of body image, and depression in early adolescent girls                                   | Rierdan J, Koff E.                                                      | Adolescence. 1997 Fall;32(127):615-24.                                     | 1997/11/14 |                                    |
| 9149447  | Body image disturbances and their change with videofeedback in anorexia nervosa                                          | Rushford N, Ostermeyer A.                                               | Behav Res Ther. 1997 May;35(5):389-98. doi: 10.1016/s0005-7967(96)00118-0. | 1997/5/1   | 10.1016/s0005-7967(96)00118-0      |
| 9225523  | Eating behaviour, weight status and depressive feelings in female adolescents                                            | Vidović V, Palle Rotar D, Komarica VZ, Juresa V.                        | Coll Antropol. 1997 Jun;21(1):277-83.                                      | 1997/6/1   |                                    |
| 10067086 | [Comparison of the body image of healthy and psychiatrically and chronically ill children using the KBMT-K]              | Breitenöder-Wehrung A, Kuhn G, Günter M, Neu A.                         | Psychother Psychosom Med Psychol. 1998 Dec;48(12):483-90.                  | 1999/3/6   |                                    |
| 9669238  | Adolescent body image dissatisfaction: relationships with self-esteem, anxiety, and depression controlling for body mass | Kostanski M, Gullone E.                                                 | J Child Psychol Psychiatry. 1998 Feb;39(2):255-62.                         | 1998/7/21  |                                    |
| 9801553  | Changes in body image, depression, and anxiety levels among women with                                                   | Neill EH, Waldrop JB.                                                   | J Am Acad Nurse Pract. 1998 May;10(5):197-                                 | 1998/11/5  | 10.1111/j.1745-7599.1998.tb01      |

|          |                                                                                                               |                                                       |                                                                                                           |            |                                                              |
|----------|---------------------------------------------------------------------------------------------------------------|-------------------------------------------------------|-----------------------------------------------------------------------------------------------------------|------------|--------------------------------------------------------------|
|          | human papillomavirus infection                                                                                |                                                       | 201. doi:<br>10.1111/j.1745-<br>7599.1998.tb01250.x.                                                      |            | 250.x                                                        |
| 9735582  | Assessment of body image dissatisfaction in obese women: specificity, severity, and clinical significance     | Sarwer DB, Wadden TA, Foster GD.                      | J Consult Clin Psychol. 1998 Aug;66(4):651-4. doi: 10.1037//0022-006x.66.4.651.                           | 1998/9/15  | 10.1037//0022-006x.66.4.651                                  |
| 10440594 | Binge eating, body image, depression, and self-efficacy in an obese clinical population                       | Cargill BR, Clark MM, Pera V, Niaura RS, Abrams DB.   | Obes Res. 1999 Jul;7(4):379-86. doi: 10.1002/j.1550-8528.1999.tb00421.x.                                  | 1999/8/10  | 10.1002/j.1550-8528.1999.tb00421.x                           |
| 10447043 | Body image, perceived pubertal timing, and adolescent mental health                                           | Siegel JM, Yancey AK, Aneshensel CS, Schuler R.       | J Adolesc Health. 1999 Aug;25(2):155-65. doi: 10.1016/s1054-139x(98)00160-8.                              | 1999/8/14  | 10.1016/s1054-139x(98)00160-8                                |
| 11348317 | The Relationship Between Tamoxifen, Estrogen, and Depressive Symptoms                                         | Thompson DS, Spanier CA, Vogel VG.                    | Breast J. 1999 Nov;5(6):375-382. doi: 10.1046/j.1524-4741.1999.98085.x.                                   | 2001/5/12  | 10.1046/j.1524-4741.1999.98085.x                             |
| 11016113 | Body-image and eating disturbances predict onset of depression among female adolescents: a longitudinal study | Stice E, Hayward C, Cameron RP, Killen JD, Taylor CB. | J Abnorm Psychol. 2000 Aug;109(3):438-44.                                                                 | 2000/10/4  |                                                              |
| 10590453 | Body dissatisfaction, bulimia, and depression among women: the mediating role of drive for thinness           | Wiederman MW, Pryor TL.                               | Int J Eat Disord. 2000 Jan;27(1):90-5. doi: 10.1002/(sici)1098-108x(200001)27:1<90::aid-eat10>3.0.co;2-0. | 1999/12/11 | 10.1002/(sici)1098-108x(200001)27:1<90::aid-eat10>3.0.co;2-0 |
| 22049465 | The Relationship between Body Image and Depressed Mood in Adolescence: A 5-year Longitudinal Panel Study      | Holsen I, Kraft P, Røysamb E.                         | J Health Psychol. 2001 Dec;6(6):613-27. doi: 10.1177/135910530100600601.                                  | 2011/11/4  | 10.1177/135910530100600601                                   |
| 11439408 | Relationship between depression and body dissatisfaction in women                                             | Keel PK, Mitchell JE, Davis TL, Crow SJ.              | Int J Eat Disord. 2001 Jul;30(1):48-56. doi:                                                              | 2001/7/6   | 10.1002/eat.1053                                             |

|          |                                                                                                                                                   |                                                     |                                                                             |            |                               |
|----------|---------------------------------------------------------------------------------------------------------------------------------------------------|-----------------------------------------------------|-----------------------------------------------------------------------------|------------|-------------------------------|
|          | diagnosed with bulimia nervosa                                                                                                                    |                                                     | 10.1002/eat.1053.                                                           |            |                               |
| 15001042 | Body image, strategies to change muscles and weight, and puberty: do they impact on positive and negative affect among adolescent boys and girls? | McCabe MP, Ricciardelli LA, Banfield S.             | Eat Behav. 2001 Summer;2(2):129-49. doi: 10.1016/s1471-0153(01)00025-3.     | 2004/3/6   | 10.1016/s1471-0153(01)00025-3 |
| 11552756 | Body-image and eating disturbances prospectively predict increases in depressive symptoms in adolescent girls: a growth curve analysis            | Stice E, Bearman SK.                                | Dev Psychol. 2001 Sep;37(5):597-607. doi: 10.1037//0012-1649.37.5.597.      | 2001/9/13  | 10.1037//0012-1649.37.5.597   |
| 11743062 | Body dissatisfaction and binge eating in obese women: the role of restraint and depression                                                        | Wardle J, Waller J, Rapoport L.                     | Obes Res. 2001 Dec;9(12):778-87. doi: 10.1038/oby.2001.107.                 | 2001/12/18 | 10.1038/oby.2001.107          |
| 12445587 | The role of body dissatisfaction as a risk factor for depression in adolescent girls: are the differences Black and White?                        | Franko DL, Striegel-Moore RH.                       | J Psychosom Res. 2002 Nov;53(5):975-83. doi: 10.1016/s0022-3999(02)00490-7. | 2002/11/26 | 10.1016/s0022-3999(02)00490-7 |
| 11786599 | Body image partially mediates the relationship between obesity and psychological distress                                                         | Friedman KE, Reichmann SK, Costanzo PR, Musante GJ. | Obes Res. 2002 Jan;10(1):33-41. doi: 10.1038/oby.2002.5.                    | 2002/1/12  | 10.1038/oby.2002.5            |
| 12386909 | Body image, teasing, and mood alterations: an experimental study of exposure to negative verbal commentary                                        | Furman K, Thompson JK.                              | Int J Eat Disord. 2002 Dec;32(4):449-57. doi: 10.1002/eat.10095.            | 2002/10/19 | 10.1002/eat.10095             |
| 12220046 | Risk factors for body dissatisfaction in adolescent girls: a longitudinal investigation                                                           | Stice E, Whitenton K.                               | Dev Psychol. 2002 Sep;38(5):669-78. doi: 10.1037//0012-1649.38.5.669.       | 2002/9/11  | 10.1037//0012-1649.38.5.669   |
| 12539795 | Relationships between body image and depressive symptoms during postpartum in ethnically diverse, low income women                                | Walker L, Timmerman GM, Kim M, Sterling B.          | Women Health. 2002;36(3):101-21. doi: 10.1300/J013v36n03_07                 | 2003/1/24  | 10.1300/J013v36n03_07         |
| 24999284 | Evaluation of an Intervention Targeting Both Depressive and Bulimic Pathology: A Randomized                                                       | Bearman SK, Stice E, Chase A.                       | Behav Ther. 2003 Summer;34(3):277-293. doi: 10.1016/S0005-                  | 2014/7/8   | 10.1016/S0005-7894(03)80001-1 |

|          |                                                                                                                                  |                                                                                                       |                                                                                       |            |                                  |
|----------|----------------------------------------------------------------------------------------------------------------------------------|-------------------------------------------------------------------------------------------------------|---------------------------------------------------------------------------------------|------------|----------------------------------|
|          | Prevention Trial                                                                                                                 |                                                                                                       | 7894(03)80001-1.                                                                      |            |                                  |
| 12576913 | Body image and depressive symptoms as correlates of self-reported versus clinician-reported physiologic function                 | Lichtenberger CM, Martin Ginis KA, MacKenzie CL, McCartney N.                                         | J Cardiopulm Rehabil. 2003 Jan-Feb;23(1):53-9. doi: 10.1097/00008483-200301000-00010. | 2003/2/11  | 10.1097/00008483-200301000-00010 |
| 12564623 | Self-reported depressive symptoms in a school sample of Italian children and adolescents                                         | Poli P, Sbrana B, Marcheschi M, Masi G.                                                               | Child Psychiatry Hum Dev. 2003 Spring;33(3):209-26. doi: 10.1023/a:1021404613832.     | 2003/2/5   | 10.1023/a:1021404613832          |
| 15314431 | [Body image, self-esteem and depression in college female students: normal and overweight]                                       | Shin HS, Paik SN.                                                                                     | Taehan Kanho Hakhoe Chi. 2003 Jun;33(3):331-8. doi: 10.4040/jkan.2003.33.3.331.       | 2004/8/18  | 10.4040/jkan.2003.33.3.331       |
| 15004870 | Effects of behavior modification on body image, depression and body fat in obese Korean elementary school children               | Moon YI, Park HR, Koo HY, Kim HS.                                                                     | Yonsei Med J. 2004 Feb 29;45(1):61-7. doi: 10.3349/ymj.2004.45.1.61.                  | 2004/3/9   | 10.3349/ymj.2004.45.1.61         |
| 14732426 | Gender differences in the association among nicotine dependence, body image, depression, and anxiety within a college population | Psujek JK, Martz DM, Curtin L, Michael KD, Aeschleman SR.                                             | Addict Behav. 2004 Feb;29(2):375-80. doi: 10.1016/j.addbeh.2003.08.031.               | 2004/1/21  | 10.1016/j.addbeh.2003.08.031     |
| 15333234 | The role of body objectification in disordered eating and depressed mood                                                         | Tiggemann M, Kuring JK.                                                                               | Br J Clin Psychol. 2004 Sep;43(Pt 3):299-311. doi: 10.1348/0144665031752925.          | 2004/8/31  | 10.1348/0144665031752925         |
| 15985998 | [Depressive symptoms and low self-esteem in obese children and adolescents]                                                      | Cortese S, Cuzzolaro M, Maffei C, Piccolo F, Ferrucci G, Tatò L, Pajno-Ferrara F, Dalla Bernardina B. | Minerva Pediatr. 2005 Apr;57(2):65-71.                                                | 2005/6/30  |                                  |
| 16238859 | Individual differences in male body-image: an examination of self-                                                               | Hallsworth L, Wade T, Tiggemann M.                                                                    | Br J Health Psychol. 2005 Sep;10(Pt 3):453-                                           | 2005/10/22 | 10.1348/135910705X26966          |

|          |                                                                                                                           |                                                         |                                                                                       |            |                              |
|----------|---------------------------------------------------------------------------------------------------------------------------|---------------------------------------------------------|---------------------------------------------------------------------------------------|------------|------------------------------|
|          | objectification in recreational body builders                                                                             |                                                         | 65. doi: 10.1348/135910705X26966.                                                     |            |                              |
| 15709818 | Dietary restraint, body dissatisfaction, and psychological distress: a prospective analysis                               | Johnson F, Wardle J.                                    | J Abnorm Psychol. 2005 Feb;114(1):119-25. doi: 10.1037/0021-843X.114.1.119.           | 2005/2/16  | 10.1037/0021-843X.114.1.119  |
| 15971250 | Ethnic differences in the prediction of eating and body image disturbances among female adolescent psychiatric inpatients | White MA, Grilo CM.                                     | Int J Eat Disord. 2005 Jul;38(1):78-84. doi: 10.1002/eat.20142.                       | 2005/6/23  | 10.1002/eat.20142            |
| 15971239 | Bulimic symptoms, cognitions, and body dissatisfaction in women with major depressive disorder                            | Wildes JE, Simons AD, Marcus MD.                        | Int J Eat Disord. 2005 Jul;38(1):9-17. doi: 10.1002/eat.20152.                        | 2005/6/23  | 10.1002/eat.20152            |
| 16231342 | Mirror exposure for the treatment of body image disturbance                                                               | Delinsky SS, Wilson GT.                                 | Int J Eat Disord. 2006 Mar;39(2):108-16. doi: 10.1002/eat.20207.                      | 2005/10/19 | 10.1002/eat.20207            |
| 16769740 | Depression and body image among women with polycystic ovary syndrome                                                      | Himelein MJ, Thatcher SS.                               | J Health Psychol. 2006 Jul;11(4):613-25. doi: 10.1177/1359105306065021.               | 2006/6/14  | 10.1177/1359105306065021     |
| 16600844 | Weight concerns, body image, depression and anxiety in Swedish adolescents                                                | Ivarsson T, Svalander P, Litlere O, Nevonen L.          | Eat Behav. 2006 May;7(2):161-75. doi: 10.1016/j.eatbeh.2005.08.005. Epub 2005 Aug 22. | 2006/4/8   | 10.1016/j.eatbeh.2005.08.005 |
| 16825828 | [Health perception, body image, sexual function and depression in menopausal women according to menopausal stages]        | Kim JH, Moon HS.                                        | Taehan Kanho Hakhoe Chi. 2006 Jun;36(3):449-56. doi: 10.4040/jkan.2006.36.3.449.      | 2006/7/11  | 10.4040/jkan.2006.36.3.449   |
| 17007599 | Body dissatisfaction prospectively predicts depressive mood and low self-esteem in adolescent girls and boys              | Paxton SJ, Neumark-Sztainer D, Hannan PJ, Eisenberg ME. | J Clin Child Adolesc Psychol. 2006 Dec;35(4):539-49. doi: 10.1207/s15374424jccp3      | 2006/9/30  | 10.1207/s15374424jccp3504_5  |

|          |                                                                                                                                                  |                                                                                                                                                                                             |                                                                                                  |            |                                    |
|----------|--------------------------------------------------------------------------------------------------------------------------------------------------|---------------------------------------------------------------------------------------------------------------------------------------------------------------------------------------------|--------------------------------------------------------------------------------------------------|------------|------------------------------------|
|          |                                                                                                                                                  |                                                                                                                                                                                             | 504 5.                                                                                           |            |                                    |
| 16953694 | Prospective predictors of body dissatisfaction in adolescent girls and boys: a five-year longitudinal study                                      | Paxton SJ, Eisenberg ME, Neumark-Sztainer D.                                                                                                                                                | Dev Psychol. 2006 Sep;42(5):888-99. doi: 10.1037/0012-1649.42.5.888.                             | 2006/9/7   | 10.1037/0012-1649.42.5.888         |
| 17606227 | Alexithymia and its relationships with body checking and body image in a non-clinical female sample                                              | De Berardis D, Carano A, Gambi F, Campanella D, Giannetti P, Ceci A, Mancini E, La Rovere R, Cicconetti A, Penna L, Di Matteo D, Scorrano B, Cotellessa C, Salerno RM, Serroni N, Ferro FM. | Eat Behav. 2007 Aug;8(3):296-304. doi: 10.1016/j.eatbeh.2006.11.005. Epub 2006 Dec 5.            | 2007/7/4   | 10.1016/j.eatbeh.2006.11.005       |
| 17243014 | Internet-delivered targeted group intervention for body dissatisfaction and disordered eating in adolescent girls: a randomized controlled trial | Heinicke BE, Paxton SJ, McLean SA, Wertheim EH.                                                                                                                                             | J Abnorm Child Psychol. 2007 Jun;35(3):379-91. doi: 10.1007/s10802-006-9097-9. Epub 2007 Jan 23. | 2007/1/24  | 10.1007/s10802-006-9097-9          |
| 18441622 | The relationship between body image and depression in women diagnosed with relapsing remitting multiple sclerosis                                | Kindrat S.                                                                                                                                                                                  | Can J Neurosci Nurs. 2007;29(1):8-13.                                                            | 2008/4/30  |                                    |
| 17458136 | Report on childhood obesity in China (5) body weight, body dissatisfaction, and depression symptoms of Chinese children aged 9-10 years          | Li YP, Ma GS, Schouten EG, Hu XQ, Cui ZH, Wang D, Kok FJ.                                                                                                                                   | Biomed Environ Sci. 2007 Feb;20(1):11-8.                                                         | 2007/4/27  |                                    |
| 17707785 | Body image, mood and quality of life in young burn survivors                                                                                     | Pope SJ, Solomons WR, Done DJ, Cohn N, Possamai AM.                                                                                                                                         | Burns. 2007 Sep;33(6):747-55. doi: 10.1016/j.burns.2006.10.387.                                  | 2007/8/21  | 10.1016/j.burns.2006.10.387        |
| 17189739 | Depression in burn reconstruction patients: symptom prevalence and association with body image dissatisfaction and physical function             | Thombs BD, Haines JM, Bresnick MG, Magyar-Russell G, Fauerbach JA, Spence RJ.                                                                                                               | Gen Hosp Psychiatry. 2007 Jan-Feb;29(1):14-20. doi: 10.1016/j.genhosppsych.2006.09.002.          | 2006/12/27 | 10.1016/j.genhosppsych.2006.09.002 |
| 18546070 | Testing a gender additive model: the role of body image in adolescent depression                                                                 | Bearman SK, Stice E.                                                                                                                                                                        | J Abnorm Child Psychol. 2008 Nov;36(8):1251-63. doi: 10.1007/s10802-008-9248-2.                  | 2008/6/12  | 10.1007/s10802-008-9248-2          |

|          |                                                                                                                                                                                                     |                                                                                                                         |                                                                                          |           |                                  |
|----------|-----------------------------------------------------------------------------------------------------------------------------------------------------------------------------------------------------|-------------------------------------------------------------------------------------------------------------------------|------------------------------------------------------------------------------------------|-----------|----------------------------------|
| 18711183 | Psychological reactions, quality of life, and body image after bilateral prophylactic mastectomy in women at high risk for breast cancer: a prospective 1-year follow-up study                      | Brandberg Y, Sandelin K, Erikson S, Jurell G, Liljegren A, Lindblom A, Lindén A, von Wachenfeldt A, Wickman M, Arver B. | J Clin Oncol. 2008 Aug 20;26(24):3943-9. doi: 10.1200/JCO.2007.13.9568.                  | 2008/8/20 | 10.1200/JCO.2007.13.9568         |
| 18773252 | Determinants of pregnancy and postpartum depression: prospective influences of depressive symptoms, body image satisfaction, and exercise behavior                                                  | Downs DS, DiNallo JM, Kirner TL.                                                                                        | Ann Behav Med. 2008 Aug;36(1):54-63. doi: 10.1007/s12160-008-9044-9. Epub 2008 Sep 5.    | 2008/9/6  | 10.1007/s12160-008-9044-9        |
| 18463009 | Examination of a multi-factorial model of body-related experiences during pregnancy: the relationships among physical symptoms, sleep quality, depression, self-esteem, and negative body attitudes | Kamysheva E, Skouteris H, Wertheim EH, Paxton SJ, Milgrom J.                                                            | Body Image. 2008 Jun;5(2):152-63. doi: 10.1016/j.bodyim.2007.12.005. Epub 2008 May 6.    | 2008/5/9  | 10.1016/j.bodyim.2007.12.005     |
| 18346504 | Body dissatisfaction, self-esteem, and depression in obese Korean children                                                                                                                          | Shin NY, Shin MS.                                                                                                       | J Pediatr. 2008 Apr;152(4):502-6. doi: 10.1016/j.jpeds.2007.09.020. Epub 2007 Nov 7.     | 2008/3/19 | 10.1016/j.jpeds.2007.09.020      |
| 19042282 | The effects of body image perceptions and sociocommunicative orientations on self-esteem, depression, and identification and involvement in the gay community                                       | Wrench JS, Knapp JL.                                                                                                    | J Homosex. 2008;55(3):471-503. doi: 10.1080/00918360802345289.                           | 2008/12/2 | 10.1080/00918360802345289        |
| 18354067 | Risk factors for major depressive disorder and the psychological impact of hysterectomy: a prospective investigation                                                                                | Yen JY, Chen YH, Long CY, Chang Y, Yen CF, Chen CC, Ko CH.                                                              | Psychosomatics. 2008 Mar-Apr;49(2):137-42. doi: 10.1176/appi.psy.49.2.137.               | 2008/3/21 | 10.1176/appi.psy.49.2.137        |
| 20070719 | Depression, anxiety and body image after treatment for invasive stage one epithelial ovarian cancer                                                                                                 | Bisseling KC, Kondalsamy-Chennakesavan S, Bekkers RL, Janda M, Obermair A.                                              | Aust N Z J Obstet Gynaecol. 2009 Dec;49(6):660-6. doi: 10.1111/j.1479-828X.2009.01074.x. | 2010/1/15 | 10.1111/j.1479-828X.2009.01074.x |

|          |                                                                                                                                  |                                                                                                            |                                                                                               |           |                                  |
|----------|----------------------------------------------------------------------------------------------------------------------------------|------------------------------------------------------------------------------------------------------------|-----------------------------------------------------------------------------------------------|-----------|----------------------------------|
| 19298151 | The role of body image and disordered eating as risk factors for depression and suicidal ideation in adolescents                 | Brausch AM, Gutierrez PM.                                                                                  | Suicide Life Threat Behav. 2009 Feb;39(1):58-71. doi: 10.1521/suli.2009.39.1.58.              | 2009/3/21 | 10.1521/suli.2009.39.1.58        |
| 19514173 | A cross-cultural examination of the relationship between negative mood states, body image and eating disorders                   | Brytek-Matera A, Schiltz L.                                                                                | Bull Soc Sci Med Grand Duche Luxemb. 2009;(1):11-25.                                          | 2009/6/12 |                                  |
| 19274053 | A structural equation model relating adiposity, psychosocial indicators of body image and depressive symptoms among adolescents  | Chaiton M, Sabiston C, O'Loughlin J, McGrath JJ, Maximova K, Lambert M.                                    | Int J Obes (Lond). 2009 May;33(5):588-96. doi: 10.1038/ijo.2009.43. Epub 2009 Mar 10.         | 2009/3/11 | 10.1038/ijo.2009.43              |
| 19129334 | The relationship between depression and body dissatisfaction across pregnancy and the postpartum: a prospective study            | Clark A, Skouteris H, Wertheim EH, Paxton SJ, Milgrom J.                                                   | J Health Psychol. 2009 Jan;14(1):27-35. doi: 10.1177/1359105308097940.                        | 2009/1/9  | 10.1177/1359105308097940         |
| 19722032 | Evaluation of body image and self-concept and their correlation with depressive symptoms in Parkinson's disease                  | Gamarra AH, Molski CS, Hilbig A, Valentini CK, Striebel VL, Rieder CR.                                     | Arq Neuropsiquiatr. 2009 Sep;67(3A):585-90. doi: 10.1590/s0004-282x2009000400002.             | 2009/9/2  | 10.1590/s0004-282x2009000400002  |
| 19388056 | Eating disorder behaviors and depression: a minimal relationship beyond social comparison, self-esteem, and body dissatisfaction | Green MA, Scott NA, Cross SE, Liao KY, Hallengren JJ, Davids CM, Carter LP, Kugler DW, Read KE, Jepson AJ. | J Clin Psychol. 2009 Sep;65(9):989-99. doi: 10.1002/jclp.20586.                               | 2009/4/24 | 10.1002/jclp.20586               |
| 18249398 | Risk of depression and other mental health disorders in women with polycystic ovary syndrome: a longitudinal study               | Kerchner A, Lester W, Stuart SP, Dokras A.                                                                 | Fertil Steril. 2009 Jan;91(1):207-12. doi: 10.1016/j.fertnstert.2007.11.022. Epub 2008 Feb 4. | 2008/2/6  | 10.1016/j.fertnstert.2007.11.022 |
| 19171324 | Men, muscles, and mood: the relationship between self-concept, dysphoria, and body image disturbances                            | McFarland MB, Kaminski PL.                                                                                 | Eat Behav. 2009 Jan;10(1):68-70. doi: 10.1016/j.eatbeh.2008.10.007. Epub 2008 Oct 28.         | 2009/1/28 | 10.1016/j.eatbeh.2008.10.007     |

|          |                                                                                                                                                                                 |                                                                                                                       |                                                                                                        |           |                                 |
|----------|---------------------------------------------------------------------------------------------------------------------------------------------------------------------------------|-----------------------------------------------------------------------------------------------------------------------|--------------------------------------------------------------------------------------------------------|-----------|---------------------------------|
| 20306763 | Self perception score from zero to ten correlates well with standardized scales of adolescent self esteem, body dissatisfaction, eating disorders risk, depression, and anxiety | O'Dea JA.                                                                                                             | Int J Adolesc Med Health. 2009 Oct-Dec;21(4):509-17. doi: 10.1515/ijamh.2009.21.4.509.                 | 2010/3/24 | 10.1515/ijamh.2009.21.4.509     |
| 19553362 | Effects of obesity and obesity-induced stress on depressive symptoms in Korean elementary school children                                                                       | Park CM, Kim MD, Hong SC, Kim Y, Hyun MY, Kwak YS, Lee CI, Park MJ, Jang YH, Moon JH, Seok EM, Song YJ, Hyeon Ju Kim. | Int J Soc Psychiatry. 2009 Jul;55(4):322-35. doi: 10.1177/0020764008094646.                            | 2009/6/26 | 10.1177/0020764008094646        |
| 19121216 | Relationship between body image disturbance and incidence of depression: the SUN prospective cohort                                                                             | Pimenta AM, Sánchez-Villegas A, Bes-Rastrollo M, López CN, Martínez-González MA.                                      | BMC Public Health. 2009 Jan 2;9:1. doi: 10.1186/1471-2458-9-1.                                         | 2009/1/6  | 10.1186/1471-2458-9-1           |
| 20382374 | Body dissatisfaction and weight-related teasing: a model of cognitive vulnerability to depression among women                                                                   | Benas JS, Uhrlass DJ, Gibb BE.                                                                                        | J Behav Ther Exp Psychiatry. 2010 Dec;41(4):352-6. doi: 10.1016/j.jbtep.2010.03.006. Epub 2010 Mar 25. | 2010/4/13 | 10.1016/j.jbtep.2010.03.006     |
| 20813600 | Elements of male body image: Prediction of depression, eating pathology and social sensitivity among gay men                                                                    | Blashill AJ.                                                                                                          | Body Image. 2010 Sep;7(4):310-6. doi: 10.1016/j.bodyim.2010.07.006.                                    | 2010/9/4  | 10.1016/j.bodyim.2010.07.006    |
| 19888646 | The role of body image dissatisfaction and depression on HAART adherence in HIV positive men: tests of mediation models                                                         | Blashill AJ, Vander Wal JS.                                                                                           | AIDS Behav. 2010 Apr;14(2):280-8. doi: 10.1007/s10461-009-9630-2.                                      | 2009/11/6 | 10.1007/s10461-009-9630-2       |
| 21308258 | Posture and body image in individuals with major depressive disorder: a controlled study                                                                                        | Canales JZ, Cordás TA, Fiquer JT, Cavalcante AF, Moreno RA.                                                           | Braz J Psychiatry. 2010 Dec;32(4):375-80. doi: 10.1590/s1516-44462010000400010.                        | 2011/2/11 | 10.1590/s1516-44462010000400010 |
| 20119938 | Childhood maltreatment, depressive symptoms, and body dissatisfaction in patients with binge eating disorder: the mediating role of self-criticism                              | Dunkley DM, Masheb RM, Grilo CM.                                                                                      | Int J Eat Disord. 2010 Apr;43(3):274-81. doi: 10.1002/eat.20796.                                       | 2010/2/2  | 10.1002/eat.20796               |

|          |                                                                                                                                                                           |                                                                                                                             |                                                                                                 |            |                                  |
|----------|---------------------------------------------------------------------------------------------------------------------------------------------------------------------------|-----------------------------------------------------------------------------------------------------------------------------|-------------------------------------------------------------------------------------------------|------------|----------------------------------|
| 20332491 | The body image drawing analysis in women with breast disease and breast cancer: anxiety, colour and depression categories                                                 | Eskelinen M, Ollonen P.                                                                                                     | Anticancer Res. 2010 Feb;30(2):683-91.                                                          | 2010/3/25  |                                  |
| 22044085 | Body dissatisfaction, maternal appraisal, and depressive symptoms in Hong Kong adolescents                                                                                | Fung SS, Stewart SM, Ho SY, Wong JP, Lam TH.                                                                                | Int J Psychol. 2010 Dec 1;45(6):453-60. doi: 10.1080/00207594.2010.481719.                      | 2011/11/3  | 10.1080/00207594.2010.481719     |
| 21109045 | The association between obesity, depression, and educational attainment in women: the mediating role of body image dissatisfaction                                        | Gavin AR, Simon GE, Ludman EJ.                                                                                              | J Psychosom Res. 2010 Dec;69(6):573-81. doi: 10.1016/j.jpsychores.2010.05.001. Epub 2010 Jul 3. | 2010/11/27 | 10.1016/j.jpsychores.2010.05.001 |
| 20433644 | Body dissatisfaction, dietary restraint, depression, and weight status in adolescents                                                                                     | Goldfield GS, Moore C, Henderson K, Buchholz A, Obeid N, Flament MF.                                                        | J Sch Health. 2010 Apr;80(4):186-92. doi: 10.1111/j.1746-1561.2009.00485.x.                     | 2010/5/4   | 10.1111/j.1746-1561.2009.00485.x |
| 19962116 | The relationship between binge eating and weight status on depression, anxiety, and body image among a diverse college sample: a focus on Bi/Multiracial women            | Ivezaj V, Saules KK, Hoodin F, Alschuler K, Angelella NE, Collings AS, Saunders-Scott D, Wiedemann AA.                      | Eat Behav. 2010 Jan;11(1):18-24. doi: 10.1016/j.eatbeh.2009.08.003. Epub 2009 Aug 29.           | 2009/12/8  | 10.1016/j.eatbeh.2009.08.003     |
| 20218759 | Overweight, body image, and depression in Asian and Hispanic adolescents                                                                                                  | Xie B, Unger JB, Gallaher P, Johnson CA, Wu Q, Chou CP.                                                                     | Am J Health Behav. 2010 Jul-Aug;34(4):476-88. doi: 10.5993/ajhb.34.4.9.                         | 2010/3/12  | 10.5993/ajhb.34.4.9              |
| 21983908 | [Puberty, body image and dysfunctional attitudes: differences between boys and girls in depressive symptoms during the transition from elementary to secondary education] | Bélanger M, Marcotte D.                                                                                                     | Sante Ment Que. 2011 Spring;36(1):131-48. doi: 10.7202/1005818ar.                               | 2011/10/11 | 10.7202/1005818ar                |
| 21410803 | Associations among musculoskeletal impairments, depression, body image and fatigue in breast cancer survivors within the first year after treatment                       | Cantarero-Villanueva I, Fernández-Lao C, Fernández-DE-Las-Peñas C, Díaz-Rodríguez L, Sanchez-Cantalejo E, Arroyo-Morales M. | Eur J Cancer Care (Engl). 2011 Sep;20(5):632-9. doi: 10.1111/j.1365-                            | 2011/3/18  | 10.1111/j.1365-2354.2011.01245.x |

|          |                                                                                                                                                                      |                                                                                                                           |                                                                                                      |            |                                  |
|----------|----------------------------------------------------------------------------------------------------------------------------------------------------------------------|---------------------------------------------------------------------------------------------------------------------------|------------------------------------------------------------------------------------------------------|------------|----------------------------------|
|          |                                                                                                                                                                      |                                                                                                                           | 2354.2011.01245.x.<br>Epub 2011 Mar 17.                                                              |            |                                  |
| 21556187 | Does the association between depressive symptomatology and physical activity depend on body image perception? A survey of students from seven universities in the UK | El Ansari W, Stock C, Phillips C, Mabhala A, Stoate M, Adetunji H, Deeny P, John J, Davies S, Parke S, Hu X, Snelgrove S. | Int J Environ Res Public Health. 2011 Feb;8(2):281-99. doi: 10.3390/ijerph8020281. Epub 2011 Jan 25. | 2011/5/11  | 10.3390/ijerph8020281            |
| 22435299 | [Depression, overweight and perceived body image among adolescents living in suburban areas]                                                                         | Gebska-Kuczerowska A, Wysocki MJ, Supranowicz P, Supranowicz T.                                                           | Rocz Panstw Zakl Hig. 2011;62(4):427-31.                                                             | 2012/3/23  |                                  |
| 21545207 | Turkish hysterectomy and mastectomy patients - depression, body image, sexual problems and spouse relationships                                                      | Keskin G, Gumus AB.                                                                                                       | Asian Pac J Cancer Prev. 2011;12(2):425-32.                                                          | 2011/5/7   |                                  |
| 21577030 | Effects of a physical exercise rehabilitation group program on anxiety, depression, body image, and health-related quality of life among breast cancer patients      | Mehnert A, Veers S, Howaldt D, Braumann KM, Koch U, Schulz KH.                                                            | Onkologie. 2011;34(5):248-53. doi: 10.1159/000327813. Epub 2011 Apr 26.                              | 2011/5/18  | 10.1159/000327813                |
| 21767109 | "The way I see it": the effect of stigma and depression on self-perceived body image among HIV-positive individuals on treatment in British Columbia, Canada         | Palmer AK, Duncan KC, Ayalew B, Zhang W, Tzemis D, Lima V, Montaner JS, Hogg RS.                                          | AIDS Care. 2011 Nov;23(11):1456-66. doi: 10.1080/09540121.2011.565021. Epub 2011 Jul 18.             | 2011/7/20  | 10.1080/09540121.2011.565021     |
| 21911106 | Depression symptoms and body dissatisfaction association among polycystic ovary syndrome women                                                                       | Pastore LM, Patrie JT, Morris WL, Dalal P, Bray MJ.                                                                       | J Psychosom Res. 2011 Oct;71(4):270-6. doi: 10.1016/j.jpsychores.2011.02.005. Epub 2011 Mar 23.      | 2011/9/14  | 10.1016/j.jpsychores.2011.02.005 |
| 22015436 | Mediating effects of body image satisfaction on exercise behavior, depressive symptoms, and gestational weight gain in pregnancy                                     | Rauff EL, Downs DS.                                                                                                       | Ann Behav Med. 2011 Dec;42(3):381-90. doi: 10.1007/s12160-011-9300-2.                                | 2011/10/22 | 10.1007/s12160-011-9300-2        |

|          |                                                                                                                                                              |                                                             |                                                                                                            |           |                                  |
|----------|--------------------------------------------------------------------------------------------------------------------------------------------------------------|-------------------------------------------------------------|------------------------------------------------------------------------------------------------------------|-----------|----------------------------------|
| 22395855 | Relationship between the body image and level of pain, functional status, severity of depression, and quality of life in patients with fibromyalgia syndrome | Akkaya N, Akkaya S, Atalay NS, Balci CS, Sahin F.           | Clin Rheumatol. 2012 Jun;31(6):983-8. doi: 10.1007/s10067-012-1965-9. Epub 2012 Mar 7.                     | 2012/3/8  | 10.1007/s10067-012-1965-9        |
| 22998142 | Body image and depressive symptoms in 13-year-old adolescents                                                                                                | Almeida S, Severo M, Araújo J, Lopes C, Ramos E.            | J Paediatr Child Health. 2012 Oct;48(10):E165-71. doi: 10.1111/j.1440-1754.2012.02576.x. Epub 2012 Sep 23. | 2012/9/25 | 10.1111/j.1440-1754.2012.02576.x |
| 22217652 | Body dissatisfaction on top of depressive mood among adolescents with severe dysmenorrhea                                                                    | Ambresin AE, Belanger RE, Chamay C, Berchtold A, Narring F. | J Pediatr Adolesc Gynecol. 2012 Feb;25(1):19-22. doi: 10.1016/j.jpag.2011.06.014.                          | 2012/1/6  | 10.1016/j.jpag.2011.06.014       |
| 22747107 | Impact of body image on depression and quality of life among women with breast cancer                                                                        | Begovic-Juhant A, Chmielewski A, Iwuagwu S, Chapman LA.     | J Psychosoc Oncol. 2012;30(4):446-60. doi: 10.1080/07347332.2012.684856.                                   | 2012/7/4  | 10.1080/07347332.2012.684856     |
| 22586508 | Body image distortion in fifth and sixth grade students may lead to stress, depression, and undesirable dieting behavior                                     | Cho JH, Han SN, Kim JH, Lee HM.                             | Nutr Res Pract. 2012 Apr;6(2):175-81. doi: 10.4162/nrp.2012.6.2.175. Epub 2012 Apr 30.                     | 2012/5/16 | 10.4162/nrp.2012.6.2.175         |
| 22873732 | The role of body image and depression in tanning behaviors and attitudes                                                                                     | Gillen MM, Markey CN.                                       | Behav Med. 2012;38(3):74-82. doi: 10.1080/08964289.2012.685499.                                            | 2012/8/10 | 10.1080/08964289.2012.685499     |
| 22134442 | Body image, sexual function and depression in Korean patients with breast cancer: modification by 5-HTT polymorphism                                         | Kim KR, Chung HC, Lee E, Kim SJ, Namkoong K.                | Support Care Cancer. 2012 Sep;20(9):2177-82. doi: 10.1007/s00520-011-1329-z. Epub 2011 Dec 2.              | 2011/12/3 | 10.1007/s00520-011-1329-z        |
| 22978081 | Depression, anxiety, body image, sexual functioning, and dyadic adjustment associated with dialysis                                                          | Oyekçin DG, Gülpek D, Sahin EM, Mete L.                     | Int J Psychiatry Med. 2012;43(3):227-41. doi: 10.2190/PM.43.3.c.                                           | 2012/9/18 | 10.2190/PM.43.3.c                |

|          |                                                                                                                                                   |                                                                                                          |                                                                                                           |            |                              |
|----------|---------------------------------------------------------------------------------------------------------------------------------------------------|----------------------------------------------------------------------------------------------------------|-----------------------------------------------------------------------------------------------------------|------------|------------------------------|
|          | type in chronic renal failure                                                                                                                     |                                                                                                          |                                                                                                           |            |                              |
| 22926673 | Evaluation of depression, quality of life and body image in patients with Cushing's disease                                                       | Alcalar N, Ozkan S, Kadioglu P, Celik O, Cagatay P, Kucukyuruk B, Gazioglu N.                            | Pituitary. 2013 Sep;16(3):333-40. doi: 10.1007/s11102-012-0425-5.                                         | 2012/8/29  | 10.1007/s11102-012-0425-5    |
| 23557812 | Relationship between eating pathology, body dissatisfaction and depressive symptoms among male and female adolescents in the United Arab Emirates | Schulte SJ, Thomas J.                                                                                    | Eat Behav. 2013 Apr;14(2):157-60. doi: 10.1016/j.eatbeh.2013.01.015. Epub 2013 Feb 17.                    | 2013/4/6   | 10.1016/j.eatbeh.2013.01.015 |
| 24004109 | Examining relationships between body dissatisfaction, maladaptive perfectionism, and postpartum depression symptoms                               | Sweeney AC, Fingerhut R.                                                                                 | J Obstet Gynecol Neonatal Nurs. 2013 Sep-Oct;42(5):551-61. doi: 10.1111/1552-6909.12236. Epub 2013 Sep 4. | 2013/9/6   | 10.1111/1552-6909.12236      |
| 24349769 | The effect of short-term aerobic exercise on depression and body image in Iranian women                                                           | Zarshenas S, Houshvar P, Tahmasebi A.                                                                    | Depress Res Treat. 2013;2013:132684. doi: 10.1155/2013/132684. Epub 2013 Nov 21.                          | 2013/12/19 | 10.1155/2013/132684          |
| 25561132 | Breast cancer and body image as a prognostic factor of depression: a case study in México City                                                    | Aguilar Cordero MJ, Mur Villar N, Neri Sánchez M, Pimentel-Ramírez ML, García-Rillo A, Gómez Valverde E. | Nutr Hosp. 2014 Dec 1;31(1):371-9. doi: 10.3305/nh.2015.31.1.7863.                                        | 2015/1/7   | 10.3305/nh.2015.31.1.7863    |
| 28360612 | Body Image, Self-Esteem and Depressive Symptomatology in Women with Polycystic Ovary Syndrome                                                     | Annagür BB, Tazegül A, Akbaba N.                                                                         | Noro Psikiyatrs. 2014 Jun;51(2):129-132. doi: 10.4274/npa.y6778. Epub 2014 Jun 1.                         | 2017/4/1   | 10.4274/npa.y6778            |
| 25383047 | Body Image Distortions, Weight, and Depression in Adolescent Boys: Longitudinal Trajectories into Adulthood                                       | Blashill AJ, Wilhelm S.                                                                                  | Psychol Men Masc. 2014;15(4):445-451. doi: 10.1037/a0034618.                                              | 2014/11/11 | 10.1037/a0034618             |
| 24254374 | Self-esteem and social support as moderators of depression, body image, and disordered eating for                                                 | Brausch AM, Decker KM.                                                                                   | J Abnorm Child Psychol. 2014;42(5):779-89. doi: 10.1007/s10802-013-                                       | 2013/11/21 | 10.1007/s10802-013-          |

|          |                                                                                                                                                                       |                                                                                                                                |                                                                                                   |            |                                   |
|----------|-----------------------------------------------------------------------------------------------------------------------------------------------------------------------|--------------------------------------------------------------------------------------------------------------------------------|---------------------------------------------------------------------------------------------------|------------|-----------------------------------|
|          | suicidal ideation in adolescents                                                                                                                                      |                                                                                                                                | 9822-0.                                                                                           |            |                                   |
| 24664939 | Impact of chemotherapy-induced alopecia distress on body image, psychosocial well-being, and depression in breast cancer patients                                     | Choi EK, Kim IR, Chang O, Kang D, Nam SJ, Lee JE, Lee SK, Im YH, Park YH, Yang JH, Cho J.                                      | Psychooncology. 2014 Oct;23(10):1103-10. doi: 10.1002/pon.3531. Epub 2014 Mar 24.                 | 2014/3/26  | 10.1002/pon.3531                  |
| 24280872 | Association between higher BMI and depressive symptoms in Icelandic adolescents: the mediational function of body image                                               | Eidsdottir ST, Kristjansson AL, Sigfusdottir ID, Garber CE, Allegrante JP.                                                     | Eur J Public Health. 2014 Dec;24(6):888-92. doi: 10.1093/eurpub/ckt180. Epub 2013 Nov 26.         | 2013/11/28 | 10.1093/eurpub/ckt180             |
| 24331307 | Toward understanding the role of body dissatisfaction in the gender differences in depressive symptoms and disordered eating: a longitudinal study during adolescence | Ferreiro F, Seoane G, Senra C.                                                                                                 | J Adolesc. 2014 Jan;37(1):73-84. doi: 10.1016/j.adolescence.2013.10.013. Epub 2013 Nov 22.        | 2013/12/17 | 10.1016/j.adolescence.2013.10.013 |
| 24623160 | Body image satisfaction and depression in midlife women: the Study of Women's Health Across the Nation (SWAN)                                                         | Jackson KL, Janssen I, Appelhans BM, Kazlauskaitė R, Karavolos K, Dugan SA, Avery EA, Shipp-Johnson KJ, Powell LH, Kravitz HM. | Arch Womens Ment Health. 2014 Jun;17(3):177-87. doi: 10.1007/s00737-014-0416-9. Epub 2014 Mar 13. | 2014/3/14  | 10.1007/s00737-014-0416-9         |
| 25337594 | Obesity, Body Image, Depression, and Weight-control Behaviour Among Female University Students in Korea                                                               | Jun EM, Choi SB.                                                                                                               | J Cancer Prev. 2014 Sep;19(3):240-6. doi: 10.15430/JCP.2014.19.3.240.                             | 2014/10/23 | 10.15430/JCP.2014.19.3.240        |
| 25562080 | Body image and depression                                                                                                                                             | Pines A.                                                                                                                       | Climacteric. 2014 Dec;17(6):726-7.                                                                | 2015/1/7   |                                   |
| 24925049 | Body image and depressive symptoms in patients with head and neck cancer: an important relationship                                                                   | Rhoten BA, Deng J, Dietrich MS, Murphy B, Ridner SH.                                                                           | Support Care Cancer. 2014 Nov;22(11):3053-60. doi: 10.1007/s00520-014-2312-2. Epub 2014 Jun 14.   | 2014/6/14  | 10.1007/s00520-014-2312-2         |
| 25203953 | [Understanding depressive symptoms after bariatric surgery: the role of weight, eating and body image]                                                                | Sousa P, Bastos AP, Venâncio C, Vaz AR, Brandão I, Costa JM, Machado P, Conceição E.                                           | Acta Med Port. 2014 Jul-Aug;27(4):450-7. Epub 2014 Aug 29.                                        | 2014/9/10  |                                   |

|          |                                                                                                                                                                                        |                                                                        |                                                                                                   |            |                                    |
|----------|----------------------------------------------------------------------------------------------------------------------------------------------------------------------------------------|------------------------------------------------------------------------|---------------------------------------------------------------------------------------------------|------------|------------------------------------|
| 25709801 | A Cross-sectional Study of Correlation of Body Image Anxiety with Social Phobia and Their Association with Depression in the Adolescents from a Rural Area of Sangli District in India | Waghachavare VB, Quraishi SR, Dhumale GB, Gore AD.                     | Int J Prev Med. 2014 Dec;5(12):1626-9.                                                            | 2015/2/25  |                                    |
| 24215653 | Symptoms of posttraumatic stress, depression, and body image distress in female victims of physical and sexual assault: exploring integrated responses                                 | Weaver TL, Griffin MG, Mitchell ER.                                    | Health Care Women Int. 2014;35(4):458-75. doi: 10.1080/07399332.2013.858162. Epub 2014 Jan 6.     | 2013/11/13 | 10.1080/07399332.2013.858162       |
| 25574864 | Relationship between body dissatisfaction and disordered eating: mediating role of self-esteem and depression                                                                          | Brechan I, Kvaalem IL.                                                 | Eat Behav. 2015 Apr;17:49-58. doi: 10.1016/j.eatbeh.2014.12.008. Epub 2014 Dec 11.                | 2015/1/10  | 10.1016/j.eatbeh.2014.12.008       |
| 26110591 | The moderating effect of perceived partner empathy on body image and depression among breast cancer survivors                                                                          | Fang SY, Chang HT, Shu BC.                                             | Psychooncology. 2015 Dec;24(12):1815-22. doi: 10.1002/pon.3868. Epub 2015 Jun 25.                 | 2015/6/26  | 10.1002/pon.3868                   |
| 26602723 | An association between the internalization of body image, depressive symptoms and restrictive eating habits among young males                                                          | Fortes Lde S, Meireles JF, Paes ST, Dias FC, Cipriani FM, Ferreira ME. | Cien Saude Colet. 2015 Nov;20(11):3457-66. doi: 10.1590/1413-812320152011.00152015.               | 2015/11/26 | 10.1590/1413-812320152011.00152015 |
| 25895137 | The role of body image in prenatal and postpartum depression: a critical review of the literature                                                                                      | Silveira ML, Ertel KA, Dole N, Chasan-Taber L.                         | Arch Womens Ment Health. 2015 Jun;18(3):409-21. doi: 10.1007/s00737-015-0525-0. Epub 2015 Apr 17. | 2015/4/21  | 10.1007/s00737-015-0525-0          |
| 25601235 | Examining pain, body image, and depressive symptoms in patients with lymphedema secondary to breast cancer                                                                             | Teo I, Novy DM, Chang DW, Cox MG, Fingeret MC.                         | Psychooncology. 2015 Nov;24(11):1377-83. doi: 10.1002/pon.3745. Epub 2015 Jan 20.                 | 2015/1/21  | 10.1002/pon.3745                   |

|          |                                                                                                                                                                           |                                                                                                                                                                                          |                                                                                                |           |                                   |
|----------|---------------------------------------------------------------------------------------------------------------------------------------------------------------------------|------------------------------------------------------------------------------------------------------------------------------------------------------------------------------------------|------------------------------------------------------------------------------------------------|-----------|-----------------------------------|
| 26446699 | Investigation of body image as a mediator of the effects of bowel and GI symptoms on psychological distress in female survivors of rectal and anal cancer                 | Benedict C, Rodriguez VM, Carter J, Temple L, Nelson C, DuHamel K.                                                                                                                       | Support Care Cancer. 2016 Apr;24(4):1795-802. doi: 10.1007/s00520-015-2976-2. Epub 2015 Oct 7. | 2015/10/9 | 10.1007/s00520-015-2976-2         |
| 27393908 | Increased rates of body dissatisfaction, depressive symptoms, and suicide attempts in Jamaican teens with sickle cell disease                                             | Bhatt-Poulose K, James K, Reid M, Harrison A, Asnani M.                                                                                                                                  | Pediatr Blood Cancer. 2016 Dec;63(12):2159-2166. doi: 10.1002/pbc.26091. Epub 2016 Jul 9.      | 2016/7/10 | 10.1002/pbc.26091                 |
| 27816699 | The associations between body dissatisfaction, body figure, self-esteem, and depressed mood in adolescents in the United States and Korea: A moderated mediation analysis | Choi E, Choi I.                                                                                                                                                                          | J Adolesc. 2016 Dec;53:249-259. doi: 10.1016/j.adolescence.2016.10.007. Epub 2016 Nov 4.       | 2016/11/7 | 10.1016/j.adolescence.2016.10.007 |
| 26826975 | Weight bias internalization in treatment-seeking overweight adults: Psychometric validation and associations with self-esteem, body image, and mood symptoms              | Durso LE, Latner JD, Ciao AC.                                                                                                                                                            | Eat Behav. 2016 Apr;21:104-8. doi: 10.1016/j.eatbeh.2016.01.011. Epub 2016 Jan 22.             | 2016/2/1  | 10.1016/j.eatbeh.2016.01.011      |
| 27473373 | Body image mediates the depressive effects of weight gain in new mothers, particularly for women already obese: evidence from the Norwegian Mother and Child Cohort Study | Han SY, Brewis AA, Wutich A.                                                                                                                                                             | BMC Public Health. 2016 Jul 29;16:664. doi: 10.1186/s12889-016-3363-8.                         | 2016/7/31 | 10.1186/s12889-016-3363-8         |
| 27267500 | The relationship of body image with symptoms of depression and anxiety in patients with anorexia nervosa during outpatient psychotherapy: Results of the ANTOP study      | Junne F, Zipfel S, Wild B, Martus P, Giel K, Resmark G, Friederich HC, Teufel M, de Zwaan M, Dinkel A, Herpertz S, Burgmer M, Tagay S, Rothermund E, Zeeck A, Ziser K, Herzog W, Löwe B. | Psychotherapy (Chic). 2016 Jun;53(2):141-51. doi: 10.1037/pst0000064.                          | 2016/6/9  | 10.1037/pst0000064                |
| 27134977 | The Prevalence and Inter-Relationship of Negative Body Image Perception, Depression and Susceptibility to                                                                 | Manaf NA, Saravanan C, Zuhrah B.                                                                                                                                                         | J Clin Diagn Res. 2016 Mar;10(3):VC01-VC04. doi:                                               | 2016/5/3  | 10.7860/JCDR/2016/16678.7341      |

|          |                                                                                                                             |                                                                                                                   |                                                                                                           |           |                               |
|----------|-----------------------------------------------------------------------------------------------------------------------------|-------------------------------------------------------------------------------------------------------------------|-----------------------------------------------------------------------------------------------------------|-----------|-------------------------------|
|          | Eating Disorders among Female Medical Undergraduate Students                                                                |                                                                                                                   | 10.7860/JCDR/2016/16678.7341. Epub 2016 Mar 1.                                                            |           |                               |
| 27173851 | Body Dissatisfaction and Mental Health Outcomes Among Korean College Students                                               | You S, Shin K.                                                                                                    | Psychol Rep. 2016 Jun;118(3):714-24. doi: 10.1177/0033294116648634. Epub 2016 May 11.                     | 2016/5/14 | 10.1177/0033294116648634      |
| 25758614 | Body image in breastfeeding women with depressive symptoms: a prospective study                                             | Zanardo V, Volpe F, Giustardi A, Canella A, Straface G, Soldera G.                                                | J Matern Fetal Neonatal Med. 2016 Mar;29(5):836-40. doi: 10.3109/14767058.2015.1020786. Epub 2015 Mar 17. | 2015/3/12 | 10.3109/14767058.2015.1020786 |
| 27548850 | Body Image, Food Addiction, Depression, and Body Mass Index in University Students                                          | Şanlıer N, Türközü D, Toka O.                                                                                     | Ecol Food Nutr. 2016 Nov-Dec;55(6):491-507. doi: 10.1080/03670244.2016.1219951. Epub 2016 Aug 22.         | 2016/8/23 | 10.1080/03670244.2016.1219951 |
| 27453978 | Body Image Perception in Acromegaly Is Not Associated with Objective Acromegalic Changes but Depends on Depressive Symptoms | Dimopoulou C, Leistner SM, Ising M, Schneider HJ, Schopohl J, Rutz S, Kosilek R, Frohner R, Stalla GK, Sievers C. | Neuroendocrinology. 2017;105(2):115-122. doi: 10.1159/000448519. Epub 2016 Jul 25.                        | 2016/7/26 | 10.1159/000448519             |
| 26929171 | Body dissatisfaction and psychological distress in adolescents: Is self-esteem a mediator?                                  | Duchesne AP, Dion J, Lalande D, Bégin C, Émond C, Lalande G, McDuff P.                                            | J Health Psychol. 2017 Oct;22(12):1563-1569. doi: 10.1177/1359105316631196. Epub 2016 Feb 29.             | 2016/3/2  | 10.1177/1359105316631196      |
| 28355343 | Association between body image dissatisfaction and depressive symptoms in adolescents                                       | Flores-Cornejo F, Kamego-Tome M, Zapata-Pachas MA, Alvarado GF.                                                   | Braz J Psychiatry. 2017 Oct-Dec;39(4):316-322. doi: 10.1590/1516-4446-2016-1947. Epub 2017 Mar 23.        | 2017/3/30 | 10.1590/1516-4446-2016-1947   |
| 28203256 | The correlation of depression with Internet use and body image in                                                           | Lim CH, Kim EJ, Kim JH, Lee JS, Lee Y, Park SH.                                                                   | Korean J Pediatr. 2017 Jan;60(1):17-23. doi:                                                              | 2017/2/17 | 10.3345/kjp.2017.60.1.17      |

|          |                                                                                                                                                                             |                                                                                                                 |                                                                                                            |           |                               |
|----------|-----------------------------------------------------------------------------------------------------------------------------------------------------------------------------|-----------------------------------------------------------------------------------------------------------------|------------------------------------------------------------------------------------------------------------|-----------|-------------------------------|
|          | Korean adolescents                                                                                                                                                          |                                                                                                                 | 10.3345/kjp.2017.60.1.1<br>7. Epub 2017 Jan 24.                                                            |           |                               |
| 28075191 | Reduction mammoplasty improves levels of anxiety, depression and body image satisfaction in patients with symptomatic macromastia in the short and long term                | Pérez-Panzano E, Gascón-Catalán A, Sousa-Domínguez R, Carrera-Lasfuentes P, García-Campayo J, Güemes-Sánchez A. | J Psychosom Obstet Gynaecol. 2017 Dec;38(4):268-275. doi: 10.1080/0167482X.2016.1270936. Epub 2017 Jan 11. | 2017/1/12 | 10.1080/0167482X.2016.1270936 |
| 28581538 | From traumatic events and dissociation to body image and depression symptoms - in search of self-destruction syndrome in adolescents who engage in nonsuicidal self-injury  | Radziwiłłowicz W, Lewandowska M.                                                                                | Psychiatr Pol. 2017 Apr 30;51(2):283-301. doi: 10.12740/PP/63801. Epub 2017 Apr 30.                        | 2017/6/6  | 10.12740/PP/63801             |
| 30137157 | [Self-esteem, body image and depression in adolescents with different nutritional conditions]                                                                               | Rentz-Fernandes AR, Silveira-Viana MD, Liz CM, Andrade A.                                                       | Rev Salud Publica (Bogota). 2017 Jan-Feb;19(1):66-72. doi: 10.15446/rsap.v19n1.47697.                      | 2018/8/24 | 10.15446/rsap.v19n1.47697     |
| 28844350 | High incidence of body image dissatisfaction in pregnancy and the postnatal period: Associations with depression, anxiety, body mass index and weight gain during pregnancy | Roomruangwong C, Kanchanatawan B, Sirivichayakul S, Maes M.                                                     | Sex Reprod Healthc. 2017 Oct;13:103-109. doi: 10.1016/j.srhc.2017.08.002. Epub 2017 Aug 7.                 | 2017/8/29 | 10.1016/j.srhc.2017.08.002    |
| 29432509 | Body image and depressive symptoms in person suffering from psoriasis                                                                                                       | Rosińska M, Rzepa T, Szramka-Pawlak B, Żaba R.                                                                  | Psychiatr Pol. 2017 Dec 30;51(6):1145-1152. doi: 10.12740/PP/68948. Epub 2017 Dec 30.                      | 2018/2/13 | 10.12740/PP/68948             |
| 27629232 | Is social engagement linked to body image and depression among aging women?                                                                                                 | Sabik NJ.                                                                                                       | J Women Aging. 2017;29(5):405-416. doi: 10.1080/08952841.2016.1213106. Epub 2016 Sep 14.                   | 2016/9/16 | 10.1080/08952841.2016.1213106 |
| 27167009 | Body image and psychological distress in nipple-sparing mastectomy:                                                                                                         | Sherman KA, Woon S, French J, Elder E.                                                                          | Psychooncology. 2017 Mar;26(3):337-345. doi:                                                               | 2016/5/12 | 10.1002/pon.4138              |

|          |                                                                                                                                            |                                                                                  |                                                                                                       |            |                                  |
|----------|--------------------------------------------------------------------------------------------------------------------------------------------|----------------------------------------------------------------------------------|-------------------------------------------------------------------------------------------------------|------------|----------------------------------|
|          | the roles of self-compassion and appearance investment                                                                                     |                                                                                  | 10.1002/pon.4138. Epub 2016 May 11.                                                                   |            |                                  |
| 27793726 | Body Image Self-Discrepancy and Depressive Symptoms Among Early Adolescents                                                                | Solomon-Krakus S, Sabiston CM, Brunet J, Castonguay AL, Maximova K, Henderson M. | J Adolesc Health. 2017 Jan;60(1):38-43. doi: 10.1016/j.jadohealth.2016.08.024. Epub 2016 Oct 25.      | 2016/10/30 | 10.1016/j.jadohealth.2016.08.024 |
| 26826166 | Adult and childhood weight influence body image and depression through weight stigmatization                                               | Stevens SD, Herbozo S, Morrell HE, Schaefer LM, Thompson JK.                     | J Health Psychol. 2017 Jul;22(8):1084-1093. doi: 10.1177/1359105315624749. Epub 2016 Jan 28.          | 2016/1/31  | 10.1177/1359105315624749         |
| 28685499 | Body image mediates the effect of cancer-related stigmatization on depression: A new target for intervention                               | Esser P, Mehnert A, Johansen C, Hornemann B, Dietz A, Ernst J.                   | Psychooncology. 2018 Jan;27(1):193-198. doi: 10.1002/pon.4494. Epub 2017 Aug 1.                       | 2017/7/8   | 10.1002/pon.4494                 |
| 29517302 | The associations between depressive and anxiety symptoms, body image, and weight in the first year postpartum: a rapid systematic review   | Hartley E, Hill B, McPhie S, Skouteris H.                                        | J Reprod Infant Psychol. 2018 Feb;36(1):81-101. doi: 10.1080/02646838.2017.1396301. Epub 2017 Nov 17. | 2018/3/9   | 10.1080/02646838.2017.1396301    |
| 29806059 | Relationship between multifaceted body image and negative affect among women undergoing mastectomy for breast cancer: a longitudinal study | Li S, Li L, Zheng H, Wang Y, Zhu X, Yang Y, Yang Y, He J.                        | Arch Womens Ment Health. 2018 Dec;21(6):681-688. doi: 10.1007/s00737-018-0860-z. Epub 2018 May 27.    | 2018/5/29  | 10.1007/s00737-018-0860-z        |
| 30334649 | Is Cybervictimization Associated with Body Dissatisfaction, Depression, and Eating Disorder Psychopathology?                               | Marco JH, Tormo-Irun MP, Galán-Escalante A, Gonzalez-García C.                   | Cyberpsychol Behav Soc Netw. 2018 Oct;21(10):611-617. doi: 10.1089/cyber.2018.0217.                   | 2018/10/19 | 10.1089/cyber.2018.0217          |
| 30316019 | Body image predictors of depressive symptoms in adolescence                                                                                | Murray K, Rieger E, Byrne D.                                                     | J Adolesc. 2018 Dec;69:130-139. doi:                                                                  | 2018/10/14 | 10.1016/j.adolescence.2018.10.0  |

|          |                                                                                                                                                                       |                                                                                                                                                                                                                                                                   |                                                                                                      |            |                                  |
|----------|-----------------------------------------------------------------------------------------------------------------------------------------------------------------------|-------------------------------------------------------------------------------------------------------------------------------------------------------------------------------------------------------------------------------------------------------------------|------------------------------------------------------------------------------------------------------|------------|----------------------------------|
|          |                                                                                                                                                                       |                                                                                                                                                                                                                                                                   | 10.1016/j.adolescence.2018.10.002. Epub 2018 Oct 10.                                                 |            | 02                               |
| 29463478 | Association Between Gender Confirmation Treatments and Perceived Gender Congruence, Body Image Satisfaction, and Mental Health in a Cohort of Transgender Individuals | Owen-Smith AA, Gerth J, Sineath RC, Barzilay J, Becerra-Culqui TA, Getahun D, Giammattei S, Hunkeler E, Lash TL, Millman A, Nash R, Quinn VP, Robinson B, Roblin D, Sanchez T, Silverberg MJ, Tangpricha V, Valentine C, Winter S, Woodyatt C, Song Y, Goodman M. | J Sex Med. 2018 Apr;15(4):591-600. doi: 10.1016/j.jsxm.2018.01.017. Epub 2018 Feb 17.                | 2018/2/22  | 10.1016/j.jsxm.2018.01.017       |
| 29758472 | Contributions of depression and body mass index to body image                                                                                                         | Paans NPG, Bot M, Brouwer IA, Visser M, Penninx BWJH.                                                                                                                                                                                                             | J Psychiatr Res. 2018 Aug;103:18-25. doi: 10.1016/j.jpsychires.2018.05.003. Epub 2018 May 7.         | 2018/5/15  | 10.1016/j.jpsychires.2018.05.003 |
| 29144209 | Bidirectional associations between body dissatisfaction and depressive symptoms from adolescence through early adulthood                                              | Sharpe H, Patalay P, Choo TH, Wall M, Mason SM, Goldschmidt AB, Neumark-Sztainer D.                                                                                                                                                                               | Dev Psychopathol. 2018 Oct;30(4):1447-1458. doi: 10.1017/S0954579417001663. Epub 2017 Nov 16.        | 2017/11/17 | 10.1017/S0954579417001663        |
| 30209863 | Chronic illness-related cognitive fusion explains the impact of body dissatisfaction and shame on depression symptoms in breast cancer patients                       | Trindade IA, Marta-Simões J, Ferreira C, Pinto-Gouveia J.                                                                                                                                                                                                         | Clin Psychol Psychother. 2018 Nov;25(6):886-893. doi: 10.1002/cpp.2323. Epub 2018 Sep 12.            | 2018/9/14  | 10.1002/cpp.2323                 |
| 25870202 | The Role of Body Image in the Link Between ADHD and Depression Symptoms Among College Students                                                                        | Van Eck K, Morse M, Flory K.                                                                                                                                                                                                                                      | J Atten Disord. 2018 Mar;22(5):435-445. doi: 10.1177/1087054715580845. Epub 2015 Apr 13.             | 2015/4/15  | 10.1177/1087054715580845         |
| 30159637 | Eating Attitudes, Weight Control Behaviors, Body Image Satisfaction and Depression Level Among Indian Medical and Nursing Undergraduate Students                      | Vijayalakshmi P, Thimmaiah R, Gandhi S, BadaMath S.                                                                                                                                                                                                               | Community Ment Health J. 2018 Nov;54(8):1266-1273. doi: 10.1007/s10597-018-0333-x. Epub 2018 Aug 29. | 2018/8/31  | 10.1007/s10597-018-0333-x        |

|          |                                                                                                                                                                                 |                                                                                                                   |                                                                                                    |            |                                  |
|----------|---------------------------------------------------------------------------------------------------------------------------------------------------------------------------------|-------------------------------------------------------------------------------------------------------------------|----------------------------------------------------------------------------------------------------|------------|----------------------------------|
| 28419648 | The role of body image dissatisfaction in the association between treatment-related scarring or disfigurement and psychological distress in adult survivors of childhood cancer | Vuotto SC, Ojha RP, Li C, Kimberg C, Klosky JL, Krull KR, Srivastava DK, Robison LL, Hudson MM, Brinkman TM.      | Psychooncology. 2018 Jan;27(1):216-222. doi: 10.1002/pon.4439. Epub 2017 May 31.                   | 2017/4/19  | 10.1002/pon.4439                 |
| 30551334 | Construing and body dissatisfaction in chronic depression: A study of body psychotherapy                                                                                        | Winter D, Malighetti C, Cipolletta S, Ahmed S, Benson B, Röhrich F.                                               | Psychiatry Res. 2018 Dec;270:845-851. doi: 10.1016/j.psychres.2018.10.061. Epub 2018 Oct 30.       | 2018/12/16 | 10.1016/j.psychres.2018.10.061   |
| 31395311 | Body-image distress is increased in women with polycystic ovary syndrome and mediates depression and anxiety                                                                    | Alur-Gupta S, Chemerinski A, Liu C, Lipson J, Allison K, Sammel MD, Dokras A.                                     | Fertil Steril. 2019 Nov;112(5):930-938.e1. doi: 10.1016/j.fertnstert.2019.06.018. Epub 2019 Aug 5. | 2019/8/10  | 10.1016/j.fertnstert.2019.06.018 |
| 30983181 | [Psychological Assessment of a sample of women with ADPKD: quality of life, body image, anxiety and depression]                                                                 | Delli Zotti GB, Sangiovanni E, Brioni E, Ratti MM, Sciarrone Aliprandi MT, Spotti D, Manunta P, Sarno L.          | G Ital Nefrol. 2019 Apr;36(2):2019-vol2.                                                           | 2019/4/16  |                                  |
| 31369342 | Body image mediates the impact of pain on depressive symptoms in patients with systemic lupus erythematosus                                                                     | Gholizadeh S, Azizoddin DR, Mills SD, Zamora G, Potemra HMK, Hirz AE, Wallace DJ, Weisman MH, Nicassio PM.        | Lupus. 2019 Aug;28(9):1148-1153. doi: 10.1177/0961203319861675.                                    | 2019/8/2   | 10.1177/0961203319861675         |
| 31082731 | Body image and its relationships with sexual functioning, anxiety, and depression in women with polycystic ovary syndrome                                                       | Kogure GS, Ribeiro VB, Lopes IP, Furtado CLM, Kodato S, Silva de Sá MF, Ferriani RA, Lara LADS, Maria Dos Reis R. | J Affect Disord. 2019 Jun 15;253:385-393. doi: 10.1016/j.jad.2019.05.006. Epub 2019 May 6.         | 2019/5/15  | 10.1016/j.jad.2019.05.006        |
| 30067399 | "It's Better to Be Depressed Skinny than Happy Fat." College Women's Memorable Body Messages and Their Impact on Body Image, Self-Esteem, and Rape Myth Acceptance              | Rubinsky V, Hosek AM, Hudak N.                                                                                    | Health Commun. 2019 Nov;34(13):1555-1563. doi: 10.1080/10410236.2018.1504659. Epub 2018 Aug 1.     | 2018/8/2   | 10.1080/10410236.2018.1504659    |

|          |                                                                                                                                                                           |                                                                                                       |                                                                                                                  |            |                               |
|----------|---------------------------------------------------------------------------------------------------------------------------------------------------------------------------|-------------------------------------------------------------------------------------------------------|------------------------------------------------------------------------------------------------------------------|------------|-------------------------------|
| 31166453 | Depression, anthropometric parameters, and body image in adults: a systematic review                                                                                      | Silva D, Ferriani L, Viana MC.                                                                        | Rev Assoc Med Bras (1992). 2019 Jun 3;65(5):731-738. doi: 10.1590/1806-9282.65.5.731.                            | 2019/6/6   | 10.1590/1806-9282.65.5.731    |
| 30152729 | Body image, satisfaction with sexual life, self-esteem, and anxiodepressive symptoms: A comparative study between premenopausal, perimenopausal, and postmenopausal women | Séjourné N, Got F, Solans C, Raynal P.                                                                | J Women Aging. 2019 Jan-Feb;31(1):18-29. doi: 10.1080/08952841.2018.1510247. Epub 2018 Aug 28.                   | 2018/8/29  | 10.1080/08952841.2018.1510247 |
| 31824352 | Perceived Stress Mediates the Relationship of Body Image and Depressive Symptoms in Individuals With Obesity                                                              | Ziser K, Finklenburg C, Behrens SC, Giel KE, Becker S, Skoda EM, Teufel M, Mack I, Zipfel S, Junne F. | Front Psychiatry. 2019 Nov 20;10:852. doi: 10.3389/fpsy.2019.00852. eCollection 2019.                            | 2019/12/12 | 10.3389/fpsy.2019.00852       |
| 32097427 | Associations between body dissatisfaction and self-reported anxiety and depression in otherwise healthy men: A systematic review and meta-analysis                        | Barnes M, Abhyankar P, Dimova E, Best C.                                                              | PLoS One. 2020 Feb 25;15(2):e0229268. doi: 10.1371/journal.pone.0229268. eCollection 2020.                       | 2020/2/26  | 10.1371/journal.pone.0229268  |
| 33288655 | Body dissatisfaction predicts the onset of depression among adolescent females and males: a prospective study                                                             | Bornioli A, Lewis-Smith H, Slater A, Bray I.                                                          | J Epidemiol Community Health. 2020 Dec 7;jech-2019-213033. doi: 10.1136/jech-2019-213033. Online ahead of print. | 2020/12/8  | 10.1136/jech-2019-213033      |
| 34542433 | Is the Effect of Body Dissatisfaction on Depressive Symptoms Dependent on Weight Status? A Study with Early-to-Middle Adolescents                                         | Carapeto MJ, Domingos R, Veiga G.                                                                     | Eur J Investig Health Psychol Educ. 2020 Nov 3;10(4):1020-1034. doi: 10.3390/ejihpe10040072.                     | 2021/9/20  | 10.3390/ejihpe10040072        |
| 32799266 | The factors affecting self-esteem, depression and body image of pregnant women in a state hospital in Turkey                                                              | Cevik E, Yanikkerem E.                                                                                | J Pak Med Assoc. 2020 Jul;70(7):1159-1164. doi: 10.5455/JPMA.19892.                                              | 2020/8/18  | 10.5455/JPMA.19892            |

|          |                                                                                                                                                                                          |                                                                                                    |                                                                                                             |            |                               |
|----------|------------------------------------------------------------------------------------------------------------------------------------------------------------------------------------------|----------------------------------------------------------------------------------------------------|-------------------------------------------------------------------------------------------------------------|------------|-------------------------------|
| 31744745 | Associations of body dissatisfaction with anxiety and depression in the pregnancy and postpartum periods: A longitudinal study                                                           | Chan CY, Lee AM, Koh YW, Lam SK, Lee CP, Leung KY, Tang CSK.                                       | J Affect Disord. 2020 Feb 15;263:582-592. doi: 10.1016/j.jad.2019.11.032. Epub 2019 Nov 12.                 | 2019/11/21 | 10.1016/j.jad.2019.11.032     |
| 30101609 | The effect of body dissatisfaction on disordered eating: The mediating role of self-esteem and negative affect in male and female adolescents                                            | Cruz-Sáez S, Pascual A, Wlodarczyk A, Echeburúa E.                                                 | J Health Psychol. 2020 Jul;25(8):1098-1108. doi: 10.1177/1359105317748734. Epub 2018 Aug 11.                | 2018/8/14  | 10.1177/1359105317748734      |
| 31742780 | Body image in older, inpatient women and the relationship to BMI, anxiety, depression, and other sociodemographic factors                                                                | Dean E, Haywood C, Hunter P, Austin N, Prendergast L.                                              | Int J Geriatr Psychiatry. 2020 Feb;35(2):182-187. doi: 10.1002/gps.5233. Epub 2019 Dec 2.                   | 2019/11/20 | 10.1002/gps.5233              |
| 31795799 | Effect of psychological care given to the women who underwent hysterectomy before and after the surgery on depressive symptoms, anxiety and the body image levels                        | Erdoğan E, Demir S, Çalışkan BB, Bayrak NG.                                                        | J Obstet Gynaecol. 2020 Oct;40(7):981-987. doi: 10.1080/01443615.2019.1678574. Epub 2019 Dec 3.             | 2019/12/5  | 10.1080/01443615.2019.1678574 |
| 31599609 | The relation between body image perceptions, parental messages, and depressive symptoms among Latinx college students                                                                    | Hitti SA, Avila M, McDonald SE, Romo S, Benzel GK, Hernandez RE, Vazquez G, Sullivan TN, Corona R. | Cultur Divers Ethnic Minor Psychol. 2020 Jul;26(3):412-418. doi: 10.1037/cdp0000309. Epub 2019 Oct 10.      | 2019/10/11 | 10.1037/cdp0000309            |
| 33062050 | Study of the effect of family communication and function, and satisfaction with body image, on psychological well-being of obese girls: the mediating role of self-esteem and depression | KavehFarsani Z, Kelishadi R, Beshlideh K.                                                          | Child Adolesc Psychiatry Ment Health. 2020 Oct 12;14:39. doi: 10.1186/s13034-020-00345-3. eCollection 2020. | 2020/10/16 | 10.1186/s13034-020-00345-3    |
| 29696998 | Understanding body image among adults in mid-late life: Considering romantic partners and depressive symptoms in the context of diabetes                                                 | Markey CH, August KJ, Dunaev JL.                                                                   | J Health Psychol. 2020 Sep;25(10-11):1707-1716. doi: 10.1177/1359105318770725. Epub 2018 Apr 26.            | 2018/4/27  | 10.1177/1359105318770725      |

|          |                                                                                                                                                                                                 |                                                                                                             |                                                                                                  |            |                               |
|----------|-------------------------------------------------------------------------------------------------------------------------------------------------------------------------------------------------|-------------------------------------------------------------------------------------------------------------|--------------------------------------------------------------------------------------------------|------------|-------------------------------|
| 33123046 | The Profiles of Body Image Associate With Changes in Depression Among Participants in Dance Movement Therapy Group                                                                              | Pylvänäinen P, Hyvönen K, Muotka J.                                                                         | Front Psychol. 2020 Oct 6;11:564788. doi: 10.3389/fpsyg.2020.564788. eCollection 2020.           | 2020/10/30 | 10.3389/fpsyg.2020.564788     |
| 32375722 | Is body image a predictor of women's depression and anxiety in postmenopausal women?                                                                                                            | Simbar M, Nazarpour S, Alavi Majd H, Dodel Andarvar K, Jafari Torkamani Z, Alsadat Rahnamaei F.             | BMC Psychiatry. 2020 May 6;20(1):202. doi: 10.1186/s12888-020-02617-w.                           | 2020/5/8   | 10.1186/s12888-020-02617-w    |
| 32846389 | Body image and depressive symptoms among transgender and cisgender adults: Examining a model integrating the tripartite influence model and objectification theory                              | Strübel J, Sabik NJ, Tylka TL.                                                                              | Body Image. 2020 Dec;35:53-62. doi: 10.1016/j.bodyim.2020.08.004. Epub 2020 Aug 23.              | 2020/8/27  | 10.1016/j.bodyim.2020.08.004  |
| 31999799 | Longitudinal bidirectional relations between body dissatisfaction and depressive symptoms among Black adolescents: A cross-lagged panel analysis                                                | Wang Y, Lynne SD, Witherspoon D, Black MM.                                                                  | PLoS One. 2020 Jan 30;15(1):e0228585. doi: 10.1371/journal.pone.0228585. eCollection 2020.       | 2020/1/31  | 10.1371/journal.pone.0228585  |
| 33507043 | Early Adolescent Social Media-Related Body Dissatisfaction: Associations with Depressive Symptoms, Social Anxiety, Peers, and Celebrities                                                       | Charmaraman L, Richer AM, Liu C, Lynch AD, Moreno MA.                                                       | J Dev Behav Pediatr. 2021 Jun-Jul 01;42(5):401-407. doi: 10.1097/DBP.0000000000000911.           | 2021/1/28  | 10.1097/DBP.0000000000000911  |
| 31960348 | Revisiting the relationship between body dissatisfaction and eating disorder symptoms in Chinese adolescents: the mediating roles of regulatory emotional self-efficacy and depression symptoms | Chen G, He J, Zhang B, Fan X.                                                                               | Eat Weight Disord. 2021 Feb;26(1):239-247. doi: 10.1007/s40519-020-00848-0. Epub 2020 Jan 20.    | 2020/1/22  | 10.1007/s40519-020-00848-0    |
| 32885991 | Depression is associated with lower levels of physical activity, body image dissatisfaction, and obesity in Chilean preadolescents                                                              | Delgado-Floody P, Guzmán-Guzmán IP, Caamaño-Navarrete F, Jerez-Mayorga D, Zulic-Agramunt C, Cofré-Lizama A. | Psychol Health Med. 2021 Apr;26(4):518-531. doi: 10.1080/13548506.2020.1817958. Epub 2020 Sep 4. | 2020/9/5   | 10.1080/13548506.2020.1817958 |

|          |                                                                                                                                                        |                                                                                       |                                                                                                      |            |                               |
|----------|--------------------------------------------------------------------------------------------------------------------------------------------------------|---------------------------------------------------------------------------------------|------------------------------------------------------------------------------------------------------|------------|-------------------------------|
| 34501475 | Dissociation and Suicidality in Eating Disorders: The Mediating Function of Body Image Disturbances, and the Moderating Role of Depression and Anxiety | Lewis YD, Kapon S, Enoch-Levy A, Yaroslavsky A, Witztum E, Stein D.                   | J Clin Med. 2021 Sep 6;10(17):4027. doi: 10.3390/jcm10174027.                                        | 2021/9/10  | 10.3390/jcm10174027           |
| 34955971 | A Randomized Control Trial of a Brief Self-Compassion Intervention for Perfectionism, Anxiety, Depression, and Body Image                              | Woodfin V, Molde H, Dundas I, Binder PE.                                              | Front Psychol. 2021 Dec 9;12:751294. doi: 10.3389/fpsyg.2021.751294. eCollection 2021.               | 2021/12/27 | 10.3389/fpsyg.2021.751294     |
| 34951477 | Secondary effects of body dissatisfaction interventions on adolescent depressive symptoms: A meta-analysis                                             | Ahuvia I, Jans L, Schleider J.                                                        | Int J Eat Disord. 2022 Feb;55(2):231-246. doi: 10.1002/eat.23659. Epub 2021 Dec 24.                  | 2021/12/24 | 10.1002/eat.23659             |
| 36582543 | Picture Perfect During a Pandemic? Body Image Concerns and Depressive Symptoms in U.S. Adolescent Girls During the COVID-19 Lockdown                   | Choukas-Bradley S, Maheux AJ, Roberts SR, Hutchinson EA, Lu C, Ladouceur CD, Silk JS. | J Child Media. 2022;16(4):481-492. doi: 10.1080/17482798.2022.2039255. Epub 2022 Feb 15.             | 2022/12/30 | 10.1080/17482798.2022.2039255 |
| 35094826 | A preliminary study of body image and depression among adults during COVID-19: A moderation model                                                      | Czepezor-Bernat K, Modrzejewska A, Modrzejewska J, Pękała M.                          | Arch Psychiatr Nurs. 2022 Feb;36:55-61. doi: 10.1016/j.apnu.2021.11.001. Epub 2021 Dec 4.            | 2022/1/31  | 10.1016/j.apnu.2021.11.001    |
| 36034238 | Body Image and Its Association with Depression, Anxiety, and Self-esteem among College going Students: A Study from Northeast India                    | Diengdoh I, Ali A.                                                                    | Indian J Community Med. 2022 Apr-Jun;47(2):218-222. doi: 10.4103/ijcm.ijcm_881_21. Epub 2022 Jul 11. | 2022/8/29  | 10.4103/ijcm.ijcm_881_21      |
| 35368118 | The effect of temperament and character on body dissatisfaction in women with bulimia nervosa: The role of low self-esteem and depression              | Jones H, McIntosh VVW, Britt E, Carter JD, Jordan J, Bulik CM.                        | Eur Eat Disord Rev. 2022 Jul;30(4):388-400. doi: 10.1002/erv.2899. Epub 2022 Apr 2.                  | 2022/4/3   | 10.1002/erv.2899              |
| 35460450 | Mediation models of anxiety and depression between temperament and drive for thinness and body dissatisfaction in anorexia nervosa                     | Jérolon A, Perduca V, Delsedime N, Abbate-Daga G, Marzola E.                          | Eat Weight Disord. 2022 Oct;27(7):2569-2581. doi: 10.1007/s40519-022-01397-4. Epub 2022              | 2022/4/23  | 10.1007/s40519-022-01397-4    |

|          |                                                                                                                                                                                                        |                                                                                                          |                                                                                                             |            |                               |
|----------|--------------------------------------------------------------------------------------------------------------------------------------------------------------------------------------------------------|----------------------------------------------------------------------------------------------------------|-------------------------------------------------------------------------------------------------------------|------------|-------------------------------|
|          |                                                                                                                                                                                                        |                                                                                                          | Apr 23.                                                                                                     |            |                               |
| 36312105 | Associations of body image with depressive symptoms and PTG among breast cancer patients: The mediating role of social support                                                                         | Li M.                                                                                                    | Front Psychol. 2022 Oct 14;13:953306. doi: 10.3389/fpsyg.2022.953306. eCollection 2022.                     | 2022/10/31 | 10.3389/fpsyg.2022.953306     |
| 34129105 | Clinically significant body dissatisfaction: prevalence and association with depressive symptoms in adolescent boys and girls                                                                          | McLean SA, Rodgers RF, Slater A, Jarman HK, Gordon CS, Paxton SJ.                                        | Eur Child Adolesc Psychiatry. 2022 Dec;31(12):1921-1932. doi: 10.1007/s00787-021-01824-4. Epub 2021 Jun 15. | 2021/6/15  | 10.1007/s00787-021-01824-4    |
| 36752246 | Levels of Depression and Anxiety and the Body Image of Female Patients on Renal Replacement Therapy                                                                                                    | Milić J, Milić Vranješ I, Šantić K, Šantić A, Vuksan-Ćusa Z, Zibar L.                                    | Psychiatr Danub. 2022 Dec;34(Suppl 10):79-85.                                                               | 2023/2/8   |                               |
| 32981330 | Association between overweight/obesity with depression, anxiety, low self-esteem, and body dissatisfaction in children and adolescents: a systematic review and meta-analysis of observational studies | Moradi M, Mozaffari H, Askari M, Azadbakht L.                                                            | Crit Rev Food Sci Nutr. 2022;62(2):555-570. doi: 10.1080/10408398.2020.1823813. Epub 2020 Sep 28.           | 2020/9/28  | 10.1080/10408398.2020.1823813 |
| 36345084 | Body image and depression in endometriosis: Examining self-esteem and rumination as mediators                                                                                                          | Pehlivan MJ, Sherman KA, Wuthrich V, Horn M, Basson M, Duckworth T.                                      | Body Image. 2022 Dec;43:463-473. doi: 10.1016/j.bodyim.2022.10.012. Epub 2022 Nov 4.                        | 2022/11/8  | 10.1016/j.bodyim.2022.10.012  |
| 35913777 | Illness stigma, body image dissatisfaction, thwarted belongingness and depressive symptoms in youth with inflammatory bowel disease                                                                    | Roberts CM, Gamwell KL, Baudino MN, Edwards CS, Jacobs NJ, Tung J, Grunow JE, Mullins LL, Chaney JM.     | Eur J Gastroenterol Hepatol. 2022 Sep 1;34(9):919-924. doi: 10.1097/MEG.0000000000002420. Epub 2022 Jul 21. | 2022/8/1   | 10.1097/MEG.0000000000002420  |
| 35457692 | Social Support Mediates the Relationship between Body Image Distress and Depressive Symptoms in Prostate Cancer Patients                                                                               | Scandurra C, Muzii B, La Rocca R, Di Bello F, Bottone M, Califano G, Longo N, Maldonato NM, Mangiapia F. | Int J Environ Res Public Health. 2022 Apr 15;19(8):4825. doi: 10.3390/ijerph19084825.                       | 2022/4/23  | 10.3390/ijerph19084825        |
| 35605706 | Body image dissatisfaction and                                                                                                                                                                         | Singh Solorzano C, Porciello G, Violani C, Grano                                                         | J Affect Disord. 2022                                                                                       | 2022/5/23  | 10.1016/j.jad.20              |

|          |                                                                                                                                               |                                                   |                                                                                                                  |            |                              |
|----------|-----------------------------------------------------------------------------------------------------------------------------------------------|---------------------------------------------------|------------------------------------------------------------------------------------------------------------------|------------|------------------------------|
|          | interoceptive sensibility significantly predict postpartum depressive symptoms                                                                | C.                                                | Aug 15;311:239-246. doi: 10.1016/j.jad.2022.05.109. Epub 2022 May 21.                                            |            | 22.05.109                    |
| 35567996 | Black women's experiences of gendered racial sexual objectification, body image, and depressive symptoms                                      | Stanton AG, Avery LR, Matsuzaka S, Espinel S.     | Body Image. 2022 Jun;41:443-452. doi: 10.1016/j.bodyim.2022.04.014. Epub 2022 May 11.                            | 2022/5/14  | 10.1016/j.bodyim.2022.04.014 |
| 37694201 | Investigating the Relationship between Self-Compassion and Body Image with Postpartum Depression in Women Referring to Health Centres in Iran | Bakhteh A, Salari N, Jaberghaderi N, Khosrorad T. | Iran J Nurs Midwifery Res. 2023 Jul 24;28(4):411-416. doi: 10.4103/ijnmr.ijnmr_269_21. eCollection 2023 Jul-Aug. | 2023/9/11  | 10.4103/ijnmr.ijnmr_269_21   |
| 36586599 | The relationship between body dissatisfaction and postpartum depressive symptoms: A cross-sectional study                                     | Chen ML, Chang SR.                                | J Affect Disord. 2023 Mar 1;324:418-423. doi: 10.1016/j.jad.2022.12.102. Epub 2022 Dec 28.                       | 2022/12/31 | 10.1016/j.jad.2022.12.102    |
| 36704671 | Association between physical activity and online sexual objectification experience: The mediating role of body-image depression               | Du XY, Wang L, Zuo YF, Wu Q, Qian YL, Ma R.       | Front Psychol. 2023 Jan 10;13:1049588. doi: 10.3389/fpsyg.2022.1049588. eCollection 2022.                        | 2023/1/27  | 10.3389/fpsyg.2022.1049588   |
| 36604631 | Relationships between physical activity, body image, BMI, depression and anxiety in Chinese college students during the COVID-19 pandemic     | Han B, Du G, Yang Y, Chen J, Sun G.               | BMC Public Health. 2023 Jan 5;23(1):24. doi: 10.1186/s12889-022-14917-9.                                         | 2023/1/5   | 10.1186/s12889-022-14917-9   |
| 37020733 | The associations between body dissatisfaction, exercise intensity, sleep quality, and depression in university students in southern China     | Hao M, Liu X, Wang Y, Wu Q, Yan W, Hao Y.         | Front Psychiatry. 2023 Mar 20;14:1118855. doi: 10.3389/fpsyg.2023.1118855. eCollection 2023.                     | 2023/4/6   | 10.3389/fpsyg.2023.1118855   |
| 37157779 | Depression, sleep quality, and body image disturbances among pregnant women in India: a cross-sectional                                       | Kadam KS, Anvekar AR, Unnithan VB.                | J Yeungnam Med Sci. 2023 Oct;40(4):394-401. doi:                                                                 | 2023/5/9   | 10.12701/jyms.2023.00087     |

|          |                                                                                                                                                                   |                                                                                           |                                                                                                                       |            |                                                   |
|----------|-------------------------------------------------------------------------------------------------------------------------------------------------------------------|-------------------------------------------------------------------------------------------|-----------------------------------------------------------------------------------------------------------------------|------------|---------------------------------------------------|
|          | study                                                                                                                                                             |                                                                                           | 10.12701/jyms.2023.00087. Epub 2023 May 9.                                                                            |            |                                                   |
| 37736230 | Depression, sleep, body image, and lifestyle: Prevalence and associated factors of depression among school-going adolescents in Delhi National Capital Region     | Khanna T, Banerjee B, Majhi MM, Futela D.                                                 | Indian J Psychiatry. 2023 Aug;65(8):825-831. doi: 10.4103/indianjpsychiatry.indianjpsychiatry_19_23. Epub 2023 Aug 7. | 2023/9/22  | 10.4103/indianjpsychiatry.indianjpsychiatry_19_23 |
| 38073680 | Association between depressive mood and body image and menopausal symptoms and sexual function in perimenopausal women                                            | Ling J, Wang YH.                                                                          | World J Clin Cases. 2023 Nov 16;11(32):7761-7769. doi: 10.12998/wjcc.v11.i32.7761.                                    | 2023/12/11 | 10.12998/wjcc.v11.i32.7761                        |
| 36857371 | Coping profiles, depression, and body image anxiety during the Covid-19 pandemic: Comparative analysis of females with thyroid diseases and a non-clinical sample | Rzeszutek M, Pięta M, Van Hoy A, Zawistowska M, Grymowicz M, Pięta W, Goloś S, Walicka M. | PLoS One. 2023 Mar 1;18(3):e0282302. doi: 10.1371/journal.pone.0282302. eCollection 2023.                             | 2023/3/1   | 10.1371/journal.pone.0282302                      |
| 38144036 | The mediating role of body image concern in the relationship between immature defense mechanisms and postpartum depression in Iranian women                       | Shakib Haji Agha R, Kachooei M.                                                           | J Educ Health Promot. 2023 Oct 31;12:344. doi: 10.4103/jehp.jehp_1038_22. eCollection 2023.                           | 2023/12/25 | 10.4103/jehp.jehp_1038_22                         |
| 37129116 | Project Body Neutrality: Piloting a digital single-session intervention for adolescent body image and depression                                                  | Smith AC, Ahuvia I, Ito S, Schleider JL.                                                  | Int J Eat Disord. 2023 Aug;56(8):1554-1569. doi: 10.1002/eat.23976. Epub 2023 May 2.                                  | 2023/5/2   | 10.1002/eat.23976                                 |
| 36687896 | Person-centered evaluation of positive body image among Chinese nursing students: Associations with body appreciation, self-concept clarity, and negative affect  | Zhang T, Su D, Li S, Yang Y, Li H.                                                        | Front Psychol. 2023 Jan 6;13:1088702. doi: 10.3389/fpsyg.2022.1088702. eCollection 2022.                              | 2023/1/23  | 10.3389/fpsyg.2022.1088702                        |
| 38101872 | Longitudinal pathways between childhood BMI, body dissatisfaction,                                                                                                | Blundell E, De Stavola BL, Kellock MD, Kelly Y, Lewis G, McMunn A, Nicholls D, Patalay P, | Lancet Psychiatry. 2024 Jan;11(1):47-55. doi:                                                                         | 2023/12/15 | 10.1016/S2215-0366(23)00365-                      |

|          |                                                                                                                                                                       |                                                                                                                                                 |                                                                                                 |           |                                  |
|----------|-----------------------------------------------------------------------------------------------------------------------------------------------------------------------|-------------------------------------------------------------------------------------------------------------------------------------------------|-------------------------------------------------------------------------------------------------|-----------|----------------------------------|
|          | and adolescent depression: an observational study using the UK Millenium Cohort Study                                                                                 | Solmi F.                                                                                                                                        | 10.1016/S2215-0366(23)00365-6.                                                                  |           | 6                                |
| 38997566 | Assessment of eating disorder symptoms, compulsive exercise, body dissatisfaction and depression in Swedish national team gymnasts, with a one-year follow-up         | Edlund K, Forsberg N, Källberg H, Melin A.                                                                                                      | Eat Weight Disord. 2024 Jul 12;29(1):46. doi: 10.1007/s40519-024-01667-3.                       | 2024/7/12 | 10.1007/s40519-024-01667-3       |
| 39118976 | Mediating effects of self-esteem and self-compassion on the relationship between body dissatisfaction and depression among adolescents with polycystic ovary syndrome | Huangfu H, Li L, Shuai W.                                                                                                                       | Front Public Health. 2024 Jul 25;12:1420532. doi: 10.3389/fpubh.2024.1420532. eCollection 2024. | 2024/8/9  | 10.3389/fpubh.2024.1420532       |
| 37431063 | Neural correlates of distorted body images in adolescent girls with anorexia nervosa: How is it different from major depressive disorder?                             | Karakuş Aydos Y, Dövençioğlu D, Karlı Oğuz K, Özdemir P, Pehlivan Türk Kızıllan M, Kanbur N, Ünal D, Nalbant K, Çetin Çuhadaroğlu F, Akdemir D. | J Neuropsychol. 2024 Mar;18(1):154-172. doi: 10.1111/jnp.12340. Epub 2023 Jul 10.               | 2023/7/11 | 10.1111/jnp.12340                |
| 38587346 | [Body dissatisfaction, self-esteem, depressive symptoms, and nutritional status in adolescents]                                                                       | Morán C, Victoriano M, Parra J, Ibacache X, Pérez R, Sánchez J, Sáez K, Mosso C.                                                                | Andes Pediatr. 2024 Feb;95(1):69-76. doi: 10.32641/andespediatr.v95i1.4779.                     | 2024/4/8  | 10.32641/andespediatr.v95i1.4779 |
| 38897304 | Problematic social media use and psychological distress in pregnancy: The mediating role of social comparisons and body dissatisfaction                               | Samra A, Dryer R.                                                                                                                               | J Affect Disord. 2024 Sep 15;361:702-711. doi: 10.1016/j.jad.2024.06.057. Epub 2024 Jun 17.     | 2024/6/19 | 10.1016/j.jad.2024.06.057        |
| 38231656 | Prevalence of poor body image and its correlation with self-esteem and depression in middle-aged women                                                                | Satwik R, Sinha D, Tiwari B.                                                                                                                    | Climacteric. 2024 Apr;27(2):202-209. doi: 10.1080/13697137.2023.2297876. Epub 2024 Jan 17.      | 2024/1/17 | 10.1080/13697137.2023.2297876    |
| 39153549 | Body image and depressive symptoms in Danish adolescents: A cross-sectional national study                                                                            | Thorup L, Zulfikari M, Sørensen CLB, Biering K.                                                                                                 | J Affect Disord. 2024 Nov 15;365:65-72. doi: 10.1016/j.jad.2024.08.016. Epub 2024 Aug 15.       | 2024/8/17 | 10.1016/j.jad.2024.08.016        |

|          |                                                                                                                                                                                         |                                                                                                                             |                                                                                                 |           |                                  |
|----------|-----------------------------------------------------------------------------------------------------------------------------------------------------------------------------------------|-----------------------------------------------------------------------------------------------------------------------------|-------------------------------------------------------------------------------------------------|-----------|----------------------------------|
| 38039419 | Association between Body-Image Satisfaction and Anxiety, Depressive Symptoms among Women with PCOS: The Mediating Role of Emotion Regulation Strategies                                 | Wang G, Liu X, Lei J.                                                                                                       | J Psychol. 2024;158(3):200-214. doi: 10.1080/00223980.2023.2283472. Epub 2023 Dec 1.            | 2023/12/1 | 10.1080/00223980.2023.2283472    |
| 38725387 | The psychological factors mediating/moderating the association between body-image disturbance and depression: A systematic review                                                       | Wang Y, Chen Y, Lu C, Kwan ATH, McIntyre RS, Yang F, Cao B.                                                                 | Psych J. 2024 Aug;13(4):527-540. doi: 10.1002/pchj.754. Epub 2024 May 10.                       | 2024/5/10 | 10.1002/pchj.754                 |
| 40526711 | Body image, obesity, and sexual coercion: Impacts on depression among students at a Nigerian university                                                                                 | Akinyemi O, Ekundayo OK, Fasokun M, Ogunyankin F, Ifoto OS, Alatise OD, Eze O, Okusami MS, Hughes K, Michael M, Akinmade A. | PLoS One. 2025 Jun 17;20(6):e0319308. doi: 10.1371/journal.pone.0319308. eCollection 2025.      | 2025/6/17 | 10.1371/journal.pone.0319308     |
| 40993830 | Effect of writing based on self-compassion on body image and psychological distress among women with systemic lupus erythematosus: a randomized clinical trial                          | Amouei K, Manookian A, Faezi ST, Sayadi L.                                                                                  | BMC Rheumatol. 2025 Sep 24;9(1):106. doi: 10.1186/s41927-025-00565-0.                           | 2025/9/24 | 10.1186/s41927-025-00565-0       |
| 40353674 | Association of objective body shape and perceived body image with depressive symptoms in men and women                                                                                  | Baek SU, Yoon JH.                                                                                                           | Psychiatry Clin Neurosci. 2025 Aug;79(8):458-465. doi: 10.1111/pcn.13836. Epub 2025 May 12.     | 2025/5/12 | 10.1111/pcn.13836                |
| 40819624 | Comparative analysis of depression and anxiety in Psoriasis and Multiple Sclerosis: The role of body image and illness personification as serial mediators                              | Barazani T, Shahar G, Aloni R.                                                                                              | J Psychiatr Res. 2025 Oct;190:357-363. doi: 10.1016/j.jpsychires.2025.08.009. Epub 2025 Aug 11. | 2025/8/17 | 10.1016/j.jpsychires.2025.08.009 |
| 40325652 | What are the effects of free dance and dance therapy on self-esteem, anxiety, body image and depressive symptoms of women undergoing breast cancer surgery? A randomized clinical trial | Barcelos de Souza JC, da Silveira J, de Bem Fretta T, Gil PR, de Azevedo Guimarães AC.                                      | J Bodyw Mov Ther. 2025 Jun;42:1159-1167. doi: 10.1016/j.jbmt.2025.03.004. Epub 2025 Mar 21.     | 2025/5/6  | 10.1016/j.jbmt.2025.03.004       |
| 41046767 | Aspects of body image as moderators                                                                                                                                                     | Bates J, Maalin N, Thornborrow T.                                                                                           | Body Image. 2025                                                                                | 2025/10/5 | 10.1016/j.bodyi                  |

|          |                                                                                                                                                     |                                                                        |                                                                                                                   |            |                            |
|----------|-----------------------------------------------------------------------------------------------------------------------------------------------------|------------------------------------------------------------------------|-------------------------------------------------------------------------------------------------------------------|------------|----------------------------|
|          | and mediators in the relationship between minority stress and depression among diverse LGBTQIA+ identities                                          |                                                                        | Dec;55:101975. doi: 10.1016/j.bodyim.2025.101975. Epub 2025 Oct 4.                                                |            | m.2025.101975              |
| 40933159 | College students' depression and body image: Unraveling the Link                                                                                    | Cheng ZJ, Tao H, Huan HG, Wu CM, Wang Q, Hao M.                        | World J Psychiatry. 2025 Sep 19;15(9):109611. doi: 10.5498/wjp.v15.i9.109611. eCollection 2025 Sep 19.            | 2025/9/11  | 10.5498/wjp.v15.i9.109611  |
| 40321385 | Body Image Distress and Depression in Head and Neck Cancer Patients- a Narrative Review                                                             | Chowdhury R, Almhanedi H, Hussain S, Gerardis G, Turkdogan S, Henry M. | Indian J Otolaryngol Head Neck Surg. 2025 May;77(5):2219-2225. doi: 10.1007/s12070-025-05461-0. Epub 2025 Apr 16. | 2025/5/5   | 10.1007/s12070-025-05461-0 |
| 40143730 | Cognitive Emotion Regulation and Its Impact on Sexual Function, Body Image, and Depression in Breast Cancer Survivors                               | Cinek BY, Varan MP, Yaprak G, Altıntaş M.                              | Psychiatry Investig. 2025 Mar;22(3):330-339. doi: 10.30773/pi.2024.0349. Epub 2025 Mar 18.                        | 2025/3/27  | 10.30773/pi.2024.0349      |
| 41153182 | Romantic Relationship Quality and Eating Disorder Symptoms in Late Pregnancy: The Serial Mediating Role of Depression and Body Dissatisfaction      | Costanzo G, Barberis N, Bevacqua E, Infurna MR, Falgares G.            | Behav Sci (Basel). 2025 Oct 14;15(10):1392. doi: 10.3390/bs15101392.                                              | 2025/10/29 | 10.3390/bs15101392         |
| 41229723 | Impact of Gender-Affirming Interventions on Mental Health and Body Image Satisfaction of Transgender Individuals: A Systematic Review               | Das HK, Kanmani TR, Nagamangala PN, Kalra P, Rajendaran S.             | Indian J Endocrinol Metab. 2025 Sep-Oct;29(5):484-494. doi: 10.4103/ijem.ijem_24_25. Epub 2025 Oct 25.            | 2025/11/13 | 10.4103/ijem.ijem_24_25    |
| 41079860 | Effect of cognitive bias modification training on body image dissatisfaction in adolescents with anorexia nervosa or depression-a pilot feasibility | Glombitza E, Cornelissen PL, Tovée MJ, Legenbauer T.                   | Front Psychol. 2025 Sep 26;16:1655064. doi: 10.3389/fpsyg.2025.1655064. eCollection 2025.                         | 2025/10/13 | 10.3389/fpsyg.2025.1655064 |

|          |                                                                                                                                                            |                                                                                |                                                                                                               |            |                               |
|----------|------------------------------------------------------------------------------------------------------------------------------------------------------------|--------------------------------------------------------------------------------|---------------------------------------------------------------------------------------------------------------|------------|-------------------------------|
|          | randomized controlled crossover study                                                                                                                      |                                                                                |                                                                                                               |            |                               |
| 41092598 | Depressive symptoms as a moderator of fat talk and body image outcomes within mother-daughter dyads                                                        | Hannapel M, Lawler JM, Arble E, Chow CM.                                       | Eat Behav. 2025 Dec;59:102040. doi: 10.1016/j.eatbeh.2025.102040. Epub 2025 Oct 9.                            | 2025/10/15 | 10.1016/j.eatbeh.2025.102040  |
| 41132182 | The association between body image and depressive symptoms in pregnant and postpartum women: a meta-analysis                                               | He J, Chen X, Luo B.                                                           | Front Public Health. 2025 Oct 8;13:1655639. doi: 10.3389/fpubh.2025.1655639. eCollection 2025.                | 2025/10/24 | 10.3389/fpubh.2025.1655639    |
| 39515483 | Correspondence to Thorup et al. Body image and depressive symptoms in Danish adolescents: A cross-sectional national study                                 | Khadijah K, Pohan RA, Astuti RD, Pohan PBA, Ramadhani E, Amalia R.             | J Affect Disord. 2025 Feb 1;370:299-300. doi: 10.1016/j.jad.2024.11.020. Epub 2024 Nov 6.                     | 2024/11/8  | 10.1016/j.jad.2024.11.020     |
| 38736329 | The protective role of positive body image on the associations between body objectification, disordered eating symptoms, and depression among Korean women | Lee M.                                                                         | Eat Disord. 2025 May-Jun;33(3):339-357. doi: 10.1080/10640266.2024.2353414. Epub 2024 May 13.                 | 2024/5/13  | 10.1080/10640266.2024.2353414 |
| 40851536 | Knowledge about polycystic ovary syndrome (PCOS), body image, and depression by PCOS status among a sample of US females                                   | Magnusson BM, Long MC, Larson RJ, Maycock L, Wood EH, Stratford G, Thacker EL. | J Psychosom Obstet Gynaecol. 2025 Sep 27;46(1):2541951. doi: 10.1080/0167482X.2025.2541951. Epub 2025 Aug 25. | 2025/8/25  | 10.1080/0167482X.2025.2541951 |
| 40916778 | Prenatal Body Image: Association with Disordered Eating Behaviors and Depressive Symptoms Across Pregnancy                                                 | Miller ML, Drake MH, Thomas EBK, Riedle KG, O'Hara MW.                         | J Womens Health (Larchmt). 2025 Dec;34(12):1508-1517. doi: 10.1177/15409996251371098. Epub 2025 Sep 5.        | 2025/9/8   | 10.1177/15409996251371098     |
| 40566262 | Exploring Male Body Image: A Scoping Review of Measurement Approaches and Mental Health Implications                                                       | Pomichter E, Cepeda-Benito A, Ahmadkaraji S, DePalma JP.                       | Int J Environ Res Public Health. 2025 May 26;22(6):834. doi: 10.3390/ijerph22060834.                          | 2025/6/26  | 10.3390/ijerph22060834        |

|          |                                                                                                                                                                                                    |                                                                                                                         |                                                                                                      |            |                               |
|----------|----------------------------------------------------------------------------------------------------------------------------------------------------------------------------------------------------|-------------------------------------------------------------------------------------------------------------------------|------------------------------------------------------------------------------------------------------|------------|-------------------------------|
| 41192943 | Body Image: A Bridge Between Depression and Quality of Life in Women With Cancer                                                                                                                   | Rotella L, Aloï M, Carbone EA, de Filippis R, Quirino D, Rania M, Saladino V, Cuzzocrea F, De Fazio P, Segura-Garcia C. | Psychooncology. 2025 Nov;34(11):e70328. doi: 10.1002/pon.70328.                                      | 2025/11/5  | 10.1002/pon.70328             |
| 40578276 | Randomized trial of a digital single-session intervention for body image and mood concerns among LGBTQ+ adolescents                                                                                | Smith AC, Ahuvia IL, Zapata JP, Cohen KA, Graham AK, Schleider JL.                                                      | Behav Res Ther. 2025 Oct;193:104809. doi: 10.1016/j.brat.2025.104809. Epub 2025 Jun 24.              | 2025/6/27  | 10.1016/j.brat.2025.104809    |
| 40660352 | Transdiagnostic body dissatisfaction: comparing adolescents with anorexia nervosa and depression during body exposure                                                                              | Stonawski V, Sasse L, Derks L, Moll GH, Kratz O, Legenbauer T, Horndasch S.                                             | Child Adolesc Psychiatry Ment Health. 2025 Jul 14;19(1):76. doi: 10.1186/s13034-025-00939-9.         | 2025/7/14  | 10.1186/s13034-025-00939-9    |
| 39566544 | Assessment of quality of life, pain, depression, and body-image in breast cancer patients in neoadjuvant therapy                                                                                   | Vieira Carvalho A, Lima Barroso VF, Lobo Baeta CC, Soares AN, Drummond-Lage AP.                                         | Psychol Health Med. 2025 Feb;30(2):325-340. doi: 10.1080/13548506.2024.2422113. Epub 2024 Nov 20.    | 2024/11/20 | 10.1080/13548506.2024.2422113 |
| 40700531 | Body Image and its Relationship with Anxiety and Depression: A Rigorous Systematic Review of Current Evidence                                                                                      | Wahi M, Patel D.                                                                                                        | Adv Mind Body Med. 2025 Fall;39(4):26-32.                                                            | 2025/7/23  |                               |
| 38712607 | Regulatory emotional self-efficacy and self-compassion mediate anxiety, depression, body image distress and subjective well-being in women with polycystic ovary syndrome: A cross-sectional study | Wang G, Liu X, Zhu S, Lei J.                                                                                            | J Adv Nurs. 2025 Jan;81(1):286-299. doi: 10.1111/jan.16220. Epub 2024 May 7.                         | 2024/5/7   | 10.1111/jan.16220             |
| 40331005 | Impact of social support on body image during chemotherapy in patients with breast cancer: The chain mediating role of depression and self-efficacy                                                | Yu X, Huang Q, Yang Y, Wang L, Wu F, Ding Y, Zong X, Wang A, Yuan C.                                                    | Asia Pac J Oncol Nurs. 2025 Feb 6;12:100664. doi: 10.1016/j.apjon.2025.100664. eCollection 2025 Dec. | 2025/5/7   | 10.1016/j.apjon.2025.100664   |
| 39849422 | The mediating effect of self-efficacy                                                                                                                                                              | Yuan Y, Tu Y, Su Y, Jin L, Tian Y, Chang X,                                                                             | BMC Public Health.                                                                                   | 2025/1/24  | 10.1186/s12889                |

|          |                                                                                                                                                                                                                    |                                                                                                                                              |                                                                                                 |            |                               |
|----------|--------------------------------------------------------------------------------------------------------------------------------------------------------------------------------------------------------------------|----------------------------------------------------------------------------------------------------------------------------------------------|-------------------------------------------------------------------------------------------------|------------|-------------------------------|
|          | and physical activity with the moderating effect of social support on the relationship between negative body image and depression among Chinese college students: a cross-sectional study                          | Yang K, Xu H, Zheng J, Wu D.                                                                                                                 | 2025 Jan 23;25(1):285. doi: 10.1186/s12889-025-21350-1.                                         |            | -025-21350-1                  |
| 41493910 | Association between body image satisfaction and depressive symptoms among young women in the UAE with Polycystic Ovary Syndrome (PCOS) and Non-PCOS: A comparative quantitative cross-sectional study              | AlMekhlafi SA, Campo-Redondo MS.                                                                                                             | PLoS One. 2026 Jan 6;21(1):e0333908. doi: 10.1371/journal.pone.0333908. eCollection 2026.       | 2026/1/6   | 10.1371/journal.pone.0333908  |
| 41386900 | Longitudinal associations between adolescent body dissatisfaction, eating disorder and depressive symptoms, and BMI: a UK twin cohort study                                                                        | Costantini I, Eley TC, Pingault JB, Davies NM, Bould H, Bulik CM, Krebs G, Lewis G, Lewis G, Llewellyn C, Diedrichs PC, Nicholls D, Solmi F. | Lancet Psychiatry. 2026 Jan;13(1):37-46. doi: 10.1016/S2215-0366(25)00333-5.                    | 2025/12/12 | 10.1016/S2215-0366(25)00333-5 |
| 41975379 | The role of anxiety and depressive symptoms in the longitudinal association between body image satisfaction and disordered eating behaviors among students from two Tibetan universities: a serial mediation model | Wu R, Huang Y, Yan X, Wang Y, Zhu M, Chen X, Guang Z, Niu Q, Lu C, Wang S.                                                                   | BMC Psychiatry. 2026 Apr 13. doi: 10.1186/s12888-026-08070-5. Online ahead of print.            | 2026/4/13  | 10.1186/s12888-026-08070-5    |
| 41883818 | The mediating role of psychological inflexibility and social avoidance in relationship between body image disturbance and depression among young adults with acne in China                                         | Xu F, Chong MC, Zhou Y, Chen J, Ruan J, Sun Y, Tang J, Yahaya NA.                                                                            | Front Public Health. 2026 Mar 10;14:1771242. doi: 10.3389/fpubh.2026.1771242. eCollection 2026. | 2026/3/26  | 10.3389/fpubh.2026.1771242    |
